1 **Characteristics and HIV-related Engagement of Male Sexual Partners of Female Sex**  
2 **Workers in Sub-Saharan Africa (SSA): a Scoping Review**

3 **Authors:** Galven Maringwa<sup>1,2</sup>, Primrose Matambanadzo<sup>1,2</sup>, James R. Hargreaves<sup>3</sup>, Elizabeth  
4 Fearon<sup>4</sup>, Frances M. Cowan<sup>1,2</sup>

5 **Institutions:**

6 <sup>1</sup> Centre for Sexual Health and HIV/AIDS Research Zimbabwe (CeSHHAR Zimbabwe)

7 <sup>2</sup> Department of International Public Health, Liverpool School of Tropical Medicine, Liverpool,  
8 United Kingdom.

9 <sup>3</sup> Department of Social and Environmental Health Research, Public Health and Policy, London  
10 School of Hygiene and Tropical Medicine, London, United Kingdom.

11 <sup>4</sup> Institute for Global Health, University College London, United Kingdom.

12 § Corresponding author: Galven Maringwa

13 4 Bath Road

14 Belgravia. Harare, 263, Zimbabwe

15 +263 772 247 073 / +263 714 771 132

16 [galven.maringwa@ceshhar.org](mailto:galven.maringwa@ceshhar.org) or [Galven.Maringwa@lstmed.ac.uk](mailto:Galven.Maringwa@lstmed.ac.uk)

17 E-mail addresses of authors:

18 GM: [galven.maringwa@ceshhar.org](mailto:galven.maringwa@ceshhar.org) / [Galven.Maringwa@lstmed.ac.uk](mailto:Galven.Maringwa@lstmed.ac.uk)

19 PM: [primrose.matambanadzo@ceshhar.org](mailto:primrose.matambanadzo@ceshhar.org)

20 JH: [James.Hargreaves@lshtm.ac.uk](mailto:James.Hargreaves@lshtm.ac.uk)

21 EF: [e.fearon@ucl.ac.uk](mailto:e.fearon@ucl.ac.uk)

22 FMC: [frances.cowan@lstmed.ac.uk](mailto:frances.cowan@lstmed.ac.uk)

23

24

25 Keywords: **Male sexual partners, Female Sex Workers, HIV Testing Uptake, Condom**  
26 **Use, Targeted interventions, Sub-Saharan Africa (SSA)**

## 27 **ABSTRACT**

### 28 **Introduction**

29 Understanding the characteristics and behaviors of male sexual partners of female sex workers  
30 (FSWs) is crucial for comprehending the dynamics of HIV transmission. We aimed to explore  
31 and quantify the existing literature on male sexual partners of FSWs in SSA, where HIV  
32 prevalence is high and the dynamics of sex work are poorly understood. We focused on the  
33 proportions of men reporting sex with FSWs, along with their characteristics, HIV prevalence,  
34 and engagement with HIV services among the general population and specific subgroups.

### 35 **Methods**

36 We searched the literature in the EBSCOhost databases (Medline Complete, Global Health, and  
37 CINAHL). We included quantitative epidemiological peer-reviewed articles published in English  
38 between January 2010 and December 2023, following PRISMA guidelines for scoping reviews.  
39 The last search was performed on 09 October 2024. Eligible studies focused on men from the  
40 general population and subgroups of men who reported having sex with FSWs. The results were  
41 synthesized narratively to identify patterns and gaps in the literature.

### 42 **Results**

43 We identified 2,067 articles and reviewed 15, including one meta-analysis. The general population  
44 meta-analysis and the articles among subgroups revealed variations in reporting sex with FSWs,  
45 differences in HIV prevalence, suboptimal HIV testing uptake, and inconsistent condom use.  
46 The proportion of general population men in SSA who had ever paid for sex was 8.5%, with a  
47 pooled HIV prevalence of 3.6% and 67.5% reported condom use at last paid sex. High-risk  
48 subgroups of men reported different rates of sex with FSWs, ranging from 6.6% to 74%. HIV

49 prevalence also varied significantly, from 7.5% to 26%. Across these high-risk groups,  
50 suboptimal HIV testing uptake and inconsistent condom use were common, with no  
51 comparative data for men who did not have sex with FSWs.

## 52 **Discussion**

53 Men who have sex with FSWs cannot be identified by specific characteristics. High-risk  
54 subgroups reported greater engagement with FSWs. Sex with an FSW was associated with higher  
55 HIV prevalence among men in the general population, with no data on subgroups. These  
56 findings highlight the need for tailored, occupation-specific interventions that address the unique  
57 needs of mobile and high-risk men.

## 58 **Introduction**

59 Sub-Saharan Africa is disproportionately affected by HIV, accounting for nearly two-thirds  
60 (65%) of the global burden of infection. Eastern and Southern Africa alone is home to 52% of  
61 the global total(1). FSWs in southern Africa have a particularly high incidence and prevalence of  
62 HIV infection(2, 3). However, research on male sexual partners of FSWs is limited.  
63 Understanding the impact of male sexual partners of FSWs on sexual partnership dynamics, and  
64 patterns of HIV transmission across different regions is important[4, 5]. Partnerships involving  
65 male sexual partners of FSWs are diverse, ranging from intimate partners including spouses and  
66 boyfriends to casual partners who pay for sex. These partnerships may be built on love, trust,  
67 emotional intimacy, and financial need or dependency.

68 In general, men have poor uptake of HIV services or other healthcare services compared to  
69 women(4, 5). This poses challenges for providing effective prevention and care(6). Additionally,  
70 male sexual partners of FSWs do not form a visible and coherent social grouping which makes  
71 them difficult to target with interventions(7). Men who have sex with FSWs across SSA are at  
72 high risk of HIV. Certain subgroups of men have been associated with a higher prevalence of  
73 having sex with FSWs, potentially due to the nature of their work which involves mobility, and  
74 extended periods of separation from their spouses. These circumstances can enable and increase  
75 sexual interactions with FSWs(8, 9). These include men working in transportation and logistics,  
76 men in mining and extractive industries, uniformed service personnel, men in the informal  
77 sector, and seasonal migrant labourers. They have the potential to both transmit and acquire  
78 HIV from FSWs. Additionally, they can transmit HIV to their low-risk regular partners or  
79 spouses in the general population, potentially increasing the incidence of HIV in broader  
80 communities.

81 Studies on HIV epidemiology among men in these population subgroups conducted before 2010  
82 found high rates of sex with FSWs and HIV prevalence among men in occupations closely

83 associated with sex work. In 1991, among 331 truck drivers in East/Central Africa, HIV  
84 prevalence was 18%, with higher rates in Central Africa (31.75%) compared to East Africa  
85 (16.65%)(10).

86 A study conducted in 2002 among 480 Nigerian naval personnel, of whom 94.4% were male,  
87 found that 32.5% of male respondents had ever paid for sex, 19.9% had done so in the past 6  
88 months, and 41% did not use condoms during recent paid sex(11). Another study conducted in  
89 South Africa in 2002 revealed that HIV prevalence among truckers and FSWs was 56%(8). In  
90 2003, HIV prevalence was 13.4% among 526 Ivorian FSWs clients(12). Among 2,825 men  
91 surveyed in Kenya in 2008, 15% of sexually active men reported sex with FSWs(13).

## 92 **Research Objectives and Questions**

93 This scoping review maps existing evidence on the prevalence of sexual interactions with FSWs,  
94 as well as the characteristics, behaviors, and HIV service uptake among men in the general  
95 population and other subgroups identified as having high HIV prevalence and high rates of  
96 interactions with FSWs since 2010. This information is important for informing future research  
97 directions and interventions specific to these populations in sub-Saharan Africa.

## 98 **Methods**

### 99 **Overview**

100 This review was guided by the Arksey and O'Malley (2005) methodological framework for  
101 scoping reviews comprising of the following five steps, (i) identify the research question, (ii)  
102 identify the relevant studies, (iii) study selection, (iv) charting the data, and (v) collating,  
103 summarizing and reporting data(14). The review was performed per Preferred Reporting Items  
104 for Systematic Reviews and Meta-Analyses extension for Scoping Reviews (PRISMA-ScR)  
105 guidelines.

106 **Protocol registration:** The protocol was registered on the Open Science Framework (OSF)

107 **Stage One: Identifying the Research Questions**

108 The overall research question is “What is known about the Characteristics and HIV-related  
109 Engagement of Male Sexual Partners of Female Sex Workers in Sub-Saharan Africa?”

110 The specific review questions to be addressed are:

- 111 1. What proportion of men in sub-Saharan Africa have sex with FSWs?
- 112 2. What socio-demographic and behavioral characteristics define men who have sex with  
113 FSWs in sub-Saharan Africa?
- 114 3. How does HIV prevalence differ among men who have sex with FSWs in sub-Saharan  
115 Africa?
- 116 4. To what extent are men who have sex with FSWs in sub-Saharan Africa engaged in  
117 sexual health services?

118 **Stage Two: Identifying Relevant Studies**

119 Peer-reviewed articles were searched from 3 electronic databases: EBSCOhost (Medline  
120 Complete, Global Health, and CINAHL). We developed search terms and their variations and  
121 then combined search terms using Boolean operators “OR” and “AND” using parentheses to  
122 group related terms and operators for clarity. For SSA, we searched for each of the countries in  
123 SSA. We also used the Medical Subject Headings (MeSH) for each search term – Table 1. To  
124 refine our search, we applied filters including publication date restrictions, language restrictions,  
125 study design, geography, source types, and age filters. The publication year was restricted to 2010  
126 to 2023.

127 TABLE 1: CONCEPTS AND SEARCH TERMS

| <b>Concept</b>          | <b>Search terms</b>                                                                                                                                                                                                                                                                                                                                                                                                    |
|-------------------------|------------------------------------------------------------------------------------------------------------------------------------------------------------------------------------------------------------------------------------------------------------------------------------------------------------------------------------------------------------------------------------------------------------------------|
| 1. Male sexual partner  | <p>"male sexual partner*" OR "sexual partner*" OR "male partner*" OR "men" OR "male client*" OR "intimate partner*" OR "paid sex among men" OR "men who purchase sex" OR "non-commercial partner*" OR "commercial partner*" OR "high-risk men" OR "bridging population" OR "men who paid for sex" OR "non-paying partners*" OR "men at high risk" OR "sex with a woman in prostitution" OR "male*" OR "single men"</p> |
| <b>Subject Headings</b> | <p><b>Male (Medline)</b><br/> <b>Men (Medline)</b><br/> <b>Male (Cinahl)</b><br/> <b>Men (Cinahl)</b><br/> <b>Single Men (Cinahl)</b><br/> <b>Males (Global Health)</b><br/> <b>Men (Global Health)</b><br/> <b>Sexual Partners (Medline)</b></p>                                                                                                                                                                      |

|                         |                                                                                                                                                                                                                                                                                                                                                                                                                                       |
|-------------------------|---------------------------------------------------------------------------------------------------------------------------------------------------------------------------------------------------------------------------------------------------------------------------------------------------------------------------------------------------------------------------------------------------------------------------------------|
|                         | <p><b>Sexual Partners (Cinahl)</b></p> <p><b>Sexual Partners (Global Health)</b></p>                                                                                                                                                                                                                                                                                                                                                  |
| 2. Female sex worker    | "female sex worker*" OR "sex work*" OR "prostitut*" OR "sell* sex" OR "sold sex" OR "trad* sex" OR "commercial sex" OR "thigh vendor*" OR "bar maid" OR "girls selling sex" OR "women selling sex" OR "high risk women" OR "high risk girls" OR "sex industry" OR "FSW" OR "key population"                                                                                                                                           |
| <b>Subject Headings</b> | <p><b>Sex Workers (Medline)</b></p> <p><b>Sex Work (Medline)</b></p> <p><b>Sex Work (Cinahl)</b></p> <p><b>Prostitutes (Global Health)</b></p> <p><b>Prostitution (Global Health)</b></p>                                                                                                                                                                                                                                             |
| 3. Sub-Saharan Africa   | "Sub-Saharan Africa" OR Angola OR Burundi OR "Central African Republic" OR Chad OR Congo OR "Democratic Republic of Congo" OR Rwanda OR Comoros OR Eritrea OR Ethiopia OR Kenya OR Madagascar OR Mauritius OR Seychelles OR Somalia OR "South Sudan" OR Sudan OR Tanzania OR Uganda OR Botswana OR Eswatini OR Lesotho OR Malawi OR Mozambique OR Namibia OR "South Africa" OR Zambia OR Zimbabwe OR Benin OR "Burkina Faso" OR "Cabo |



|                         |                                                                                                                                                                                                                                                                                                        |
|-------------------------|--------------------------------------------------------------------------------------------------------------------------------------------------------------------------------------------------------------------------------------------------------------------------------------------------------|
|                         | Verde" OR "Equatorial Guinea" OR Gabon OR Gambia OR Ghana OR Guinea OR "Guinea Bissau" OR Liberia OR Mali OR Mauritania OR Niger OR Nigeria OR "Sao Tome and Principe" OR Senegal OR "Sierra Leone" OR Togo OR "Côte d'Ivoire" OR “Africa, South of the Sahara” OR “Africa South of the Sahara” OR SSA |
| <b>Subject Headings</b> | <p><b>Africa South of the Sahara (Medline) + a subject heading for each country</b></p> <p><b>Africa South of the Sahara (Cinahl) + a subject heading for each country</b></p> <p><b>Africa South of the Sahara (Global Health) + a subject heading for each country</b></p>                           |
| <b>4. Final search</b>  | Concept 1 “AND” Concept 2 “AND” Concept 3                                                                                                                                                                                                                                                              |

129 **Stage Three: Study Selection**

130 Studies were selected in three stages – retrieval, screening, and data extraction.

131 **Article retrieval**

132 In the first stage, GM used the above-mentioned strategy to search literature. All duplicate  
133 articles were removed using Endnote version 20 reference management software with a 'find  
134 duplicates' function. All articles were then exported to the Covidence reference manager for  
135 review. A trail of the electronic searches was saved on users' EBSCOhost accounts: Medline  
136 Complete, CINAHL, and Global Health. Inappropriate articles were excluded at this stage.

137 **Screening**

138 In the second stage, a titles and abstracts review was conducted by GM, then a full-text review  
139 against the inclusion criteria. GM and PM independently conducted article screening for  
140 relevance and resolved all conflicts documenting reasons for article exclusions. The population in  
141 the synthesis comprises men from the general population and specific high-risk subgroups in  
142 SSA. These subgroups, such as truck drivers, miners, and military personnel, are characterized by  
143 high mobility. While the subgroups were not pre-specified, all the articles analyzed included  
144 questions about whether the men had had sex with an FSW or paid for sex. Full-text articles  
145 were retrieved after the reviewers reached a consensus on which articles to include based on  
146 predefined criteria. This ensured a comprehensive evaluation of the articles to determine their  
147 relevance and suitability for the research or review project. During the conflict resolution  
148 process, we encountered no significant discrepancies requiring formal reporting.

149 **Data extraction**

150 GM extracted data from the articles that met the inclusion criteria. The electronic search strategy  
151 retrieved 2,067 studies, from which 410 duplicates (19.8%) were removed. We screened the titles

152 and abstracts of the 1657 (80.2%) that remained. Sixty-five (65) studies underwent full-text  
153 review, of which 15 (23.1%) met the inclusion criteria. Most of the relevant studies were  
154 retrieved from the Medline Complete database. The search results and the study inclusion  
155 process are reported in full and presented in a PRISMA-ScR flow diagram – Fig 1.

#### 156 **Stage Four: Charting the Data**

157 A single Excel spreadsheet was used to compile the study characteristics that were extracted  
158 from full articles for validation. Data collected from each study included: authors, country,  
159 population type, concept, study design, sampling strategy, survey dates, participants' socio-  
160 demographics, sexual behaviour, and HIV prevalence. We also reported reasons for study  
161 exclusion for all excluded articles (S2 Appendix ).

#### 162 **Stage Five: Collating, Summarizing, and Reporting the Results**

163 We conducted a narrative review aligned with the review objectives and questions, presenting the  
164 findings in graphs, tables, and narrative summaries.

#### 165 **Methodological quality appraisal and data synthesis**

166 We selected the scoping review method to outline the different types of evidence related to our  
167 area of interest and identify gaps for further research. We used the Appraisal tool for Cross-  
168 Sectional Studies (AXIS) to appraise studies that we included for the review(15) – S1 Appendix.

#### 169 **Ethics and dissemination**

170 We did not require ethical approvals as this was a literature review.

#### 171 **Results**

#### 172 **Characteristics of the included studies**

173 The surveys reported in the meta-analysis are distributed as follows: Central Africa (n=7, 10.9%),  
174 Western Africa (n=27, 42.2%), Eastern Africa (n=23, 35.9%), and Southern Africa (n=7, 10.9%).  
175 Surveys included in the metanalysis were the AIDS Indicator Survey (AIS), Demographic and  
176 Health Surveys (DHS), Population-based HIV Impact Assessment (PHIA), the Kenya AIDS  
177 Indicator Survey (KAIS), and the South African National HIV Prevalence, Incidence, Behaviour  
178 and Communication Survey (SABSSM). These studies were used to assess population sizes, HIV  
179 prevalence, and HIV prevention among men who paid for sex in SSA (2010–2020).

180 There were 14 studies among population subgroups included in the synthesis, of which 6  
181 (42.8%) were conducted in the transport and logistics industry(17-21, 30), 3 (21.4%) among male  
182 patrons recruited in social venues (25-27), 2(14.3%) among personnel in the mining and  
183 extractive industry(23, 31), 2 (14.3%) among migrants and refugees(22, 23), and one among  
184 military personnel(32). These studies assessed varying outcomes including HIV prevalence, HIV  
185 testing history, condom use, and paid sex prevalence. An overview of each of these studies is  
186 shown in Table 2.

187 **TABLE 2: SUMMARY OF EACH REVIEWED STUDY**

|    | Authorship                                          | Country         | Population/<br>Participants               | Concept                                                                                        | Participant<br>characteristics                                                                                                                          | Study Design    | Sampling strategy                                                                                      | Dates of<br>survey           |
|----|-----------------------------------------------------|-----------------|-------------------------------------------|------------------------------------------------------------------------------------------------|---------------------------------------------------------------------------------------------------------------------------------------------------------|-----------------|--------------------------------------------------------------------------------------------------------|------------------------------|
| 1. | W. Gaolaolwe,<br>et al., 2023(16)                   | Botswana        | Long-distance<br>truck drivers<br>(LDTD). | Knowledge of HIV<br>transmission ways,<br>uptake of HIV<br>prevention strategies eg<br>condoms | Age, religion,<br>education, age at start<br>of driving, duration in<br>the industry,<br>relationship status                                            | Cross-sectional | Simple random<br>sampling technique                                                                    | February<br>August 2017.     |
| 2. | Adeoti,<br>Adekunle<br>Olatayo, et al.,<br>2021(17) | Nigeria         | Long-distance<br>truck drivers<br>(LDTD). | Perceived sexual risk<br>factors and willingness<br>to undergo HIVST.                          | Age, duration as a<br>driver, BMI, smoking<br>history, alcohol<br>consumption, paid sex,<br>age at first sex, number<br>of partners, drug use           | Cross-sectional | Systematic random<br>sampling                                                                          | Sept –<br>2019               |
| 3. | <u>Sinead Delany-<br/>Moretlwe,</u><br>2013         | South<br>Africa | Long-distance<br>truck drivers<br>(LDTD). | Prevalence of HIV and<br>correlates of HIV<br>infection                                        | Age, marital status,<br>province of residence,<br>education, income, job<br>type, access to medical<br>treatment, language,<br>years as a trucker, time | Cross-sectional | Two-stage stratified<br>sampling<br>Stage 1: A 10%<br>random sample of<br>depots<br>was drawn from the | October<br>2003 and<br>2004. |

|    |                                                 |              |                                     |                    |                                                                                                                                                                    |                 |                                                                                                                                                      |                             |
|----|-------------------------------------------------|--------------|-------------------------------------|--------------------|--------------------------------------------------------------------------------------------------------------------------------------------------------------------|-----------------|------------------------------------------------------------------------------------------------------------------------------------------------------|-----------------------------|
|    |                                                 |              |                                     |                    | on the road, frequency away from home, have another home, knowledge of STI, awareness of truckers' clinics, knowledge of HCT, perceived HIV risk, testing history. |                 | list, stratified by small, medium, and large depots<br>Stage 2: All eligible drivers were recruited within each strata until sample size was reached |                             |
| 4. | <u>Samanta Tresha Lalla-Edward,</u><br>2019(18) | South Africa | Long-distance truck drivers (LDTD). | Health status      | Age, years driving, hours spent driving, days spent driving, country of origin, race, education, marital status,                                                   | Cross-sectional | Convenience sampling                                                                                                                                 | October 2017 and March 2017 |
| 5. | Carlos Botão,                                   | Mozambique   | Long-distance                       | HIV prevalence and | Age, language.                                                                                                                                                     | Cross-sectional | Convenience                                                                                                                                          | February                    |

|    |                         |          |                             |                             |                                                                                   |                 |                                                                                                                                                                           |                 |
|----|-------------------------|----------|-----------------------------|-----------------------------|-----------------------------------------------------------------------------------|-----------------|---------------------------------------------------------------------------------------------------------------------------------------------------------------------------|-----------------|
|    | 2016(19)                | ue       | truck drivers (LDTD).       | associated risk factors     | Education, circumcision, marital status, nationality, number of trips per month   |                 | sampling                                                                                                                                                                  | and August 2012 |
| 6. | Yihunie Lakew, 2014(20) | Ethiopia | Taxi drivers and assistants | HIV related risk behaviours | Age, education, marital status, religion, duration as taxi driver, taxi ownership | Cross-sectional | Multistage cluster sampling<br>Stage 1: available clusters were identified based on the usual taxi density.<br>Stage 2: Random selection of participant from each cluster | April 2006.     |
| 7. | Christina P             | Uganda   | Motorcycle                  | Prevalence of HIV/          | Age                                                                               | Respondent-     | Respondent-driven                                                                                                                                                         | 2008 to 2009    |

|    |                                     |              |              |                                   |                                                                                                                                                |                 |                        |                         |
|----|-------------------------------------|--------------|--------------|-----------------------------------|------------------------------------------------------------------------------------------------------------------------------------------------|-----------------|------------------------|-------------------------|
|    | Lindan,<br>2015(21)                 |              | taxi drivers | sexually transmitted infections   | Years in school<br>Religion<br>Marital status<br>Circumcision<br>Number of partners<br>Condom use<br>HIV testing history<br>HIV status         | driven sampling | sampling               |                         |
| 8. | Cynthia Sema' Baltazar,<br>2014(22) | South Africa | Miners       | HIV Prevalence and Risk Behaviors | Age, language, religion, circumcision status, areas of residence in Mozambique and South Africa, education, occupation, years worked in mines, | Cross-sectional | Time-location sampling | Feb to May 2012         |
| 9. | Hordofa                             | Ethiopia     | Gold miners  | HIV preventive                    | Age, religion, ethnicity,                                                                                                                      | Cross-sectional | Simple random          | Jan 15, to Feb 15, 2010 |



|    |                             |                                  |                                        |                                                                                                                              |                                                                          |                 |                                              |                            |
|----|-----------------------------|----------------------------------|----------------------------------------|------------------------------------------------------------------------------------------------------------------------------|--------------------------------------------------------------------------|-----------------|----------------------------------------------|----------------------------|
|    | Gutema Abdissa, 2014(23)    |                                  |                                        | behavior and associated factors-actions and practices that individuals adopt to reduce their risk of acquiring HIV infection | marital status, education, monthly income                                |                 | sampling                                     | 15, 2012.                  |
| 10 | Bonnie Robin Tran, 2019(24) | Democratic Republic of the Congo | Military personnel                     | Relationship between alcohol use and sexual risk behaviors including sex with FSW                                            | Age, education, marital status, military rank, military branch and AUDIT | Cross-sectional | Multi-stage sampling<br>Convenience sampling | October 2014 to April 2015 |
| 11 | Eric Abella Roth, 2014(25)  | Kenya                            | Male patrons in venues – PLACE surveys | Investigating the reasons, motivations, and justifications behind men's                                                      | Age, marital status, education, weekly income, number of children        | Cross-sectional | Venue-based sampling                         | July-December 2010         |

|    |                               |                   |                                        |                                                                                                            |                                                                                                                                        |                                        |                                                                 |                                 |
|----|-------------------------------|-------------------|----------------------------------------|------------------------------------------------------------------------------------------------------------|----------------------------------------------------------------------------------------------------------------------------------------|----------------------------------------|-----------------------------------------------------------------|---------------------------------|
|    |                               |                   |                                        | involvement in commercial sex within the specific cultural and economic context of the informal settlement |                                                                                                                                        |                                        |                                                                 |                                 |
| 12 | Olanrewaju Olaniyan, 2017(26) | Nigeria           | Male patrons in venues – PLACE surveys | Level of desire or request for heterosexual commercial sex services                                        | Age, marital status, education, age at first sex, age at first paid sex debut, number of dependents, place of patronising, amount paid | Cross-sectional                        | Multi-stage sampling<br>Purposive sampling then random sampling | Not specified                   |
| 13 | Paul J. Fleming, 2015(27)     | Ghana<br>Tanzania | Male patrons in venues                 | Role of relationship types on condom use                                                                   | Age, salary in the past month, and education), attitudes towards                                                                       | Time-space sampling<br>Cross-sectional | Time-space sampling                                             | June<br>November<br>2008 in Ten |

|    |                         |          |                           |                                                    |                                                                          |                     |                                                                                                                                                 |                                                                     |
|----|-------------------------|----------|---------------------------|----------------------------------------------------|--------------------------------------------------------------------------|---------------------|-------------------------------------------------------------------------------------------------------------------------------------------------|---------------------------------------------------------------------|
|    |                         |          |                           |                                                    | gender equality, and self-reported sexually transmitted infections (STI) |                     |                                                                                                                                                 | Ghana<br>September<br>2008<br>February 2009<br>in Mbale<br>Tanzania |
| 14 | Kassa Tiruneh, 2015(28) | Ethiopia | Seasonal migrant laborers | Sexual behavior and vulnerability to HIV infection | Age<br>Religion<br>Ethnicity<br>Marital status<br>Education              | Cross-sectional     | Multistage random sampling<br>Stage 1: Random sampling of primary sampling units<br>Stage 2: systematic random sampling of participant per unit | July 8–18, 2015                                                     |
| 15 | Caroline Hodgins(29)    | SSA      | Sexually active men       | Population size, HIV prevalence, and use           | Age<br>Residency                                                         | Multi-stage cluster | Comprehensive sampling                                                                                                                          | 2010 - 2020                                                         |

|  |  |  |                                                                          |                                  |                                                                                                                                                                   |          |  |  |
|--|--|--|--------------------------------------------------------------------------|----------------------------------|-------------------------------------------------------------------------------------------------------------------------------------------------------------------|----------|--|--|
|  |  |  | recruited to population representative household surveys in 34 countries | of HIV prevention and treatment. | Population size<br>Lifetime number of sexual partners<br>Condom use<br>HIV prevalence<br>HIV testing,<br>Antiretroviral (ARV) use<br>Viral load suppression (VLS) | sampling |  |  |
|--|--|--|--------------------------------------------------------------------------|----------------------------------|-------------------------------------------------------------------------------------------------------------------------------------------------------------------|----------|--|--|

189 **Description of studies**

190 A total of 15 studies were included in the synthesis, comprising 78 surveys. Of these, 64 were  
191 population-based (from 1 meta-analysis), 1 was a single study conducted in two countries (Ghana  
192 and Tanzania), and 13 were single-setting studies focused on sub-groups of men. These surveys  
193 were distributed as follows: 8 (10.3%) in 6 Central African countries, 30 (38.5%) in 13 Western  
194 African countries, 29 (37.2%) in 12 Eastern African countries, and 11 (14.1%) in 5 Southern  
195 African countries – Fig 2.

196 **Type of methods and design**

197 All surveys included in the meta-analysis employed multi-stage cluster sampling to ensure  
198 national representativeness. Simple random sampling was used in two studies(23, 33). The  
199 sampling frames were drawn from all the LD'TDs registered for services at the weighbridge, as  
200 well as from lists generated at the small mining sites where they worked. Systematic random  
201 sampling was utilized among LD'TD in one study where all available truck drivers were  
202 numbered, and the truckers with odd numbers were selected(17). Multi-stage stratified sampling  
203 was employed in studies involving various groups: taxi drivers (from taxi stations to drivers),  
204 LD'TDs (from depots to drivers), military personnel (from military bases to units, then soldiers),  
205 male patrons (from areas to brothels, then clients), and seasonal migrant labourers (from study  
206 sites to migrants)(20, 26, 28, 30, 32). Convenience sampling was employed among LD'TD in two  
207 studies(18, 19). Time allocation sampling was used among miners and male patrons from social  
208 venues(25, 27, 31). Lastly, one study utilized respondent-driven sampling (RDS) among high-risk  
209 motorcycle taxi drivers.

210 **Sample sizes**

211 The meta-analysis recruited a substantial proportion of men from 34 countries representing 95%  
212 of men in the SSA(29)The total number of men recruited in subgroups was 10,286. Fig 3  
213 provides key findings across articles about sample size, and HIV prevalence by subgroup.

#### 214 **Socio-demographic and behavioral characteristics of sexual partners of FSWs**

215 The demographic characteristics of the research participants were not fully reported across all  
216 the studies. However, the meta-analysis included men aged 15-54 years, from both urban and  
217 rural areas(29). The socio-demographic characteristics presented for the subgroups apply to all  
218 men recruited in the studies. For the subpopulation studies, the age range spanned from 15 years  
219 among taxi drivers, assistants, and miners in Ethiopia, to over 50 years among LDTD in  
220 Nigeria, military men in DRC, male patrons in Kenya and Nigeria, and miners in South  
221 Africa(17, 20, 23-26, 31).

222 Marital and relationship status varied across studies. The proportion of married men ranged  
223 from 16.1% among social venue patrons to 88.5% among LDTD. Conversely, the rates of being  
224 single or unmarried ranged from 3.1% among LDTD in South Africa to 75.6% among taxi  
225 drivers and their assistants in Ethiopia. Other relationship types reported included steady  
226 girlfriends (22.3%) and casual girlfriends (9.5%) among LDTD in Botswana, 35.6% categorized  
227 as 'partnered' among migrants and refugees, and 3.6% who were 'living together' with sexual  
228 partners among LDTD in South Africa. Marital status was positively associated with HIV  
229 prevalence. Married men who were not staying with their spouses, as well as unmarried men who  
230 were staying with partners, were more likely to be HIV positive.

231 Depending on the country and context, different education categories were used with a lack of  
232 standardization across studies. Among military personnel in the DRC, 50.7% had completed  
233 primary education. In contrast, 36.0% of seasonal migrants in Ethiopia were unable to read or  
234 write. In Kenya, 42.0% of male patrons had only completed primary education, while 36.8% of  
235 high-risk motorcycle taxi drivers in Uganda had received 12 or more years of education. Men

236 with primary education or lower were found to have higher odds of living with HIV among  
237 LDTD in Mozambique.

238 Alcohol and drug use varied by type of population. Alcohol use ranged between 64.0% among  
239 seasonal migrant labourers to 78.1% among LDTD in the past 6 months. Alcohol consumption  
240 was associated with higher HIV prevalence among seasonal migrant labourers.

241 **The proportion of men who pay for sex**

242 The prevalence of paid sex varied considerably among studies in sub-Saharan Africa (SSA)  
243 mainly due to differences in study population and methodology.

244 ***Findings from the meta-analysis of the general population***

245 The meta-analysis reported that 8.5% (95% CI: 6.4%-11.2%) of men in the general population  
246 self-reported ever paying for sex between 2010 and 2020[12]- Fig 3. The highest proportions  
247 were reported in Central and Eastern Africa at 15.2% (95% CI: 5.8-34.3) and 12.4% (95% CI:  
248 8.3-18.0) compared to Western and Southern Africa at 6.0% (95% CI: 4.4-8.0), and 5.0% (95%  
249 CI: 2.7-9.1) respectively.

250 ***Findings from the high-risk subpopulation studies***

251 The proportion of high-risk men who ever paid for sex ranged from 33.1% to 56.9%(16, 21).  
252 Among those who reported recent paid sex, the proportions ranged from 14% to 34-74% over  
253 the past 6 months(17, 18, 28). Paid sex in the past 12 months ranged from 6.6% to 27.1%  
254 highlighting high levels of heterogeneity in the prevalence of paid sex by subgroup and time  
255 variations(19, 31) – Fig 3.

256 ***Factors associated with having sex with an FSW***

257 The meta-analysis did not report factors associated with paid sex. Only 6 articles among  
258 subgroups investigated factors associated with paid sex. In Botswana, LD'TDs who had at least  
259 one girlfriend, were international rather than local drivers, had more years in the trucking  
260 industry, and lived with a wife rather than a girlfriend or alone or with family were more likely to  
261 have paid for sex in the past 12 months(33). Having multiple sexual partners in the past 6  
262 months was associated with paid sex among LD'TD in Nigeria(17). In Kenya, beliefs that men  
263 should practice sex before marriage, friends thinking that it is always right to have sex with FSWs  
264 in the bar, and that when they go to bars they always have enough money to afford an FSW were



265 positively associated with having had sex with an FSW they met in a bar among male patrons  
266 recruited at public venues(25). Among military personnel in the DRC, probable problematic  
267 alcohol use was associated with having sex with an FSW(32). A study among male patrons in  
268 social venues in Nigeria found that younger men (<30 years), single or married but not living  
269 with their spouse, unemployed, earning more than 35,000 Naira, and patronizing street-based sex  
270 workers rather than brothels or houses were more likely to have sex with an FSW weekly(26).

## 271 **HIV prevalence**

### 272 ***Findings from the meta-analysis of the general population***

273 In the meta-analysis, men who reported having ever paid for sex were more likely to be HIV  
274 positive with a prevalence ratio of 1.50 (95% CI 1.31–1.72) compared to men who did not. The  
275 meta-analysis did not provide data on regional differences in the relationship between paying for  
276 sex and HIV prevalence(29). Across the studies, the pooled HIV prevalence was 3.6%, (95% CI  
277 1.6% – 8.1%) in studies conducted between 2010 and 2020 – Fig 3.

### 278 ***Findings from the high-risk subpopulation studies***

279 Only 5 studies among subgroups of men reported on HIV prevalence, and the data are not  
280 disaggregated by whether or not they paid for sex. HIV prevalence among LDTD in South  
281 Africa ranged from 7.1% (95% CI: 5.3-9.5) in 2019 to 26% (95% CI: 24.0-28.0) in 2013(18, 30).  
282 HIV prevalence was 22.3% (95% CI: 17.8-26.9) among miners in South Africa in 2014(31),  
283 15.4% among LDTD in Mozambique in 2016, and 7.5% (95% CI: 5.2-10.0) among high-risk  
284 motorcycle taxi drivers in Uganda in 2015(21) – Fig 3.

### 285 ***Factors associated with HIV prevalence***

286 In the meta-analysis, men who reported sex with FSWs were more likely to be living with HIV  
287 compared to those who did not. The meta-analysis did not examine any factors associated with  
288 HIV prevalence among men who had sex with FSWs. Four studies in subpopulations examined

289 factors associated with HIV prevalence but did not compare men who had sex with FSWs and  
290 those who did not(19, 21, 30, 31). Many high-risk men were unaware of their HIV-positive status  
291 due to a lack of prior testing. Having a previous testing history was associated with 30% lower  
292 odds of being HIV-positive among LDTD in South Africa, compared to those with no prior  
293 HIV testing history(30). HIV among all men from high-risk groups was associated with factors  
294 such as being married, older age, low education, alcohol use, higher income, lack of HIV testing,  
295 living conditions allowing multiple partnerships, younger entry into truck driving, more time on  
296 the road, genital cleaning before sex, receiving healthcare abroad, foreign residency, and primary  
297 language. Limited HIV knowledge also correlated with higher prevalence in men frequently  
298 having sex with FSWs.

## 299 **Engagement in HIV prevention and care services**

### 300 **Condom use**

#### 301 *Findings from the meta-analysis of the general population*

302 The proportion of general population men who self-reported using a condom during their most  
303 recent paid sex was 67.5% (95% CI: 63.9%–70.9%)– Fig 4. Condom use data was not reported  
304 for men who did not have sex with FSWs. The meta-analysis did not disaggregate condom use  
305 proportions by region for the same period(29).

#### 306 *Findings from the high-risk subpopulation studies*

307 Among men in high-risk sub-populations, reported condom use differed by sub-population and  
308 partner type. Condom use at the last sex ranged from 18.5% in 2014 to 93% in 2014(20, 31).  
309 Condom use in the past 6 months ranged from 22.6% in 2021 to 83.0 % 2019(17, 18). There  
310 was inconsistent condom use reported across these subgroups of men – Fig 4.

#### 311 *Factors associated with condom use*

312 The meta-analysis did not report on factors associated with condom use among general  
313 population men. Limited condom use among LDTD was attributed to a lack of access to  
314 condoms. Although knowledge about HIV protection through condoms was reported to be high  
315 in some studies, this did not always translate to consistent use. Unsafe sex due to lack of access  
316 to condoms was also positively associated with higher HIV prevalence among these high-risk  
317 men.

## 318 **HIV testing**

### 319 *Findings from the meta-analysis of the general population*

320 The pooled proportion of men who ever tested for HIV among those who had ever had sex  
321 with FSWs was 64.9% (95% CI: 52.0%–75.9%) for surveys conducted between 2010 and 2020 –  
322 Fig 5. This increased from 31.9% (95% CI 25.5% - 39.1%) before 2010. No comparative data  
323 were reported for men who had never had sex with FSWs.

### 324 *Findings from the high-risk subpopulation studies*

325 The proportion of subgroups of men who ever tested for HIV ranged from 36.9% in 2015 to  
326 88.8% in 2014(19, 21, 31). Less than half, 43.5% of gold miners reported testing in the past 3  
327 months in Ethiopia in 2014(23). A third of LDTD in Mozambique had never tested for HIV and  
328 thus lacked knowledge of their statuses in 2016(19) - Fig 5. These findings suggest that testing  
329 patterns were inconsistent across different countries and subgroups of high-risk men.

### 330 *Factors associated with HIV testing*

331 In the meta-analysis among general population men who reported ever sex with FSWs were  
332 more likely to have tested for HIV compared to men who did not. In the subgroups, limited use  
333 of health care services, access to health care services, and lack of educational interventions  
334 contributed to lower testing uptake rates. Fear and stigma also played a role in lower testing  
335 uptake. In the case of miners, higher uptake of testing resulted from a desire to know their status

336 and testing as a requirement by the mine owners. LDTD in Mozambique who had never tested  
337 for HIV had significantly higher odds of being HIV positive compared to those who had ever  
338 tested for HIV, adjusted odds ratio [aOR: 2.2, 95% CI: 1.2 – 4.3].

339

## 340 **Discussion**

341 We found varied levels of paid sex between men in the general population and subgroups known  
342 to have higher HIV prevalence. Proportions of individuals reporting sex with an FSW varied  
343 among different subgroups. Factors associated with paid sex were not analyzed in the meta-  
344 analysis, though several factors were identified among the studies conducted in subgroups, but  
345 without comparative data for men who didn't have sex with FSWs. Men who report having sex  
346 with FSWs have diverse socio-demographic and behavioral profiles. However, certain  
347 occupations pose higher risks for HIV and paid sex. HIV prevalence differed by population type.  
348 It was substantially higher among those who paid for sex compared to those who did not among  
349 men in the general population. HIV testing uptake was moderate in the general population but  
350 suboptimal in most subgroups.

351 Paying for sex per se was not identified as a risk factor for HIV among men from high-risk  
352 populations, suggesting either that paying for sex is ubiquitous (but underreported) or that a  
353 broader range of lifestyle factors contributes to a higher risk of HIV among these men.

354 One of the strengths of our study is the inclusion of a large meta-analysis conducted across 34  
355 countries in SSA. The surveys were large, and representative, and the methods used were broadly  
356 similar making comparisons across regions meaningful. The geographical breadth provided  
357 insights into regional patterns in HIV epidemiology and sex with an FSW. Another strength of  
358 the study is the inclusion of studies conducted among different populations and geographies  
359 offering information on HIV prevalence among additional high-risk men.

360 Our review had limitations. One of the limitations of the review is that the meta-analysis did not  
361 provide a detailed analysis of the socio-demographic and behavioural characteristics associated  
362 with paid sex. In terms of the subpopulations we only identified a limited number of studies

363 reporting research among high-risk men who have sex with FSWs reflecting the relatively small  
364 amount of research in this important group that has been conducted since 2010. We did not  
365 include unpublished or grey literature or articles that were not published in English (although we  
366 only found 1 article in other languages). Another drawback is that we were unable to capture the  
367 various social and cultural elements impacting sexual partnerships between FSWs and their  
368 sexual partners, which may have been recorded qualitatively, because the scoping review only  
369 included quantitative studies. The absence of disaggregated data on men who had sex with FSWs  
370 in comparison to those who did not is another drawback. Recall bias may have influenced the  
371 results, possibly resulting in missing, erroneous, or untrustworthy data that underreported or  
372 overreported sexual behaviour. Providing socially acceptable responses to sensitive information  
373 could also have affected study findings(34, 35). Subgroup studies employed a variety of  
374 methodological approaches for recruiting survey participants and used different measures of  
375 paying for sex across various settings. The lack of standardization in measuring some variables  
376 made it difficult to compare the included studies. One more challenge is the limited reporting of  
377 HIV prevalence data. This suggests that further research is needed to better understand the  
378 epidemiology of HIV among higher-risk men. This limited our ability to draw specific  
379 conclusions about FSW partners' behaviors and needs and reduced the potential to tailor  
380 interventions specifically for this subgroup.

381 Although our findings are not generalizable, they can still inform local program development.  
382 There is no one-size-fits-all strategy that can effectively address the unique needs of these men.  
383 Understanding HIV testing behaviors is crucial for men, as regular testing is key to early  
384 detection and treatment of HIV. Our findings indicate poor uptake of HIV testing among some  
385 men in the review. Comparably, 90.0% of migrant men in South Africa had ever tested for HIV  
386 in 2024 potentially due to increased awareness and access to testing services(36).

387 The lower uptake of HIV testing may be because of limited access to healthcare, fear of stigma  
388 and discrimination, limited knowledge about HIV risks, and economic challenges(37).  
389 Underreporting of engaging with sex workers by men may lead to a lower perceived risk of HIV,  
390 which is a barrier to testing(38). Embarrassment, fear of diagnosis, feeling healthy, fear of blood  
391 draws, distance from clinics, confidentiality concerns, and lack of testing knowledge could also  
392 contribute. Higher testing uptake could possibly be due to social desirability bias and desire to  
393 know their HIV statuses, which could have led to over-reporting of recent testing(31).

394 Future research should clarify definitions and variables of relevance, such as periods for having  
395 sex with an FSW, condom use, and accessing healthcare services, and separate findings between  
396 paying and non-paying sexual partnerships to better guide targeted HIV interventions.  
397 Furthermore, extensive multi-site studies using uniform protocols would enable significant cross-  
398 setting comparisons. Additionally, protocol standardization can enhance the creation of focused  
399 interventions by facilitating meta-analyses of HIV epidemiology among high-risk men, while  
400 longitudinal studies may aid in evaluating changes over time. It might be possible to update that  
401 review and include more recent surveys and more behavioural or other variables in the analysis  
402 enabling resource allocation to reduce the spread of HIV.

403 While the studies included in this review provide valuable insights into the behaviors and needs  
404 of men who have sex with FSWs and their engagement with HIV services, it is important to note  
405 that none of the included studies assessed the effectiveness of specific interventions. Therefore,  
406 the interventions discussed here are informed by observed risk behaviors and gaps in service use.  
407 However, further research is needed to evaluate their potential impact.

408 Targeted strategies are needed to address the social, economic, and behavioral factors driving  
409 these interactions. The International Labour Organization (ILO) emphasizes focusing on  
410 vulnerable places, such as land borders, trading posts, truck stops, and urban informal  
411 settlements, rather than vulnerable groups when tackling migration-related health concerns in the

412 transport sector(39). Peer educators and trained community volunteers from high-risk groups  
413 can also promote healthier behaviors through behaviour change communication and condom  
414 distribution(40, 41).

415 HIV self-testing (HIVST) is crucial for populations facing stigma and discrimination, improving  
416 testing rates among hard-to-reach men(42). Innovative strategies, like digital technology and  
417 mobile testing, can increase HIV testing uptake. The use of chatbots and mobile apps increases  
418 information dissemination, reduces access barriers, and offers real-time support(43-47). Key  
419 opinion leaders also play important roles(48). Community and home-based interventions, with  
420 proven effectiveness, can increase testing among men who avoid healthcare facilities (49-53).  
421 Additionally, secondary distribution of self-test kits to women attending antenatal care and their  
422 partners can increase men's testing rates(54, 55).

423 Programs using mobile clinics, such as Médecins Sans Frontières' initiative in South Africa,  
424 increased ART initiation and testing among migrant farmworkers(56). Universal test and treat  
425 (UTT) and treatment as prevention (TasP) can further target high-risk men, including military  
426 personnel, with mandatory testing before deployments(57, 58). Multi-venue kit distribution in  
427 workplaces and social venues can offer convenience and privacy and successfully reach first-time  
428 testers(59, 60). Mobile testing at truck stops, military camps, and transport hubs further enhances  
429 HIV service access(61, 62).

430 Initiatives like North Star Alliance's roadside clinics along transport corridors improve service  
431 access for truck drivers(63). The use of community ART distribution points (PODIs) and  
432 Community ART Refill Groups (CARGs) are effective for people living with HIV (PLWHIV)  
433 facing stigma by reducing waiting times and addressing accessibility issues for high-risk men(64,  
434 65). Integrating PrEP and ART with sexual health services is crucial for these populations.  
435 Installing condom dispensers at public venues could help overcome barriers like stigma and  
436 privacy concerns, increasing uptake among men.



## 437 **Conclusions**

438 Our study found varied prevalences of sex with FSWs among men, differing by population type.  
439 Furthermore, men who engage with FSWs cannot be easily identified by specific characteristics.  
440 Our results add critical information to the body of knowledge regarding men who are sexual  
441 partners of FSWs in SSA. In summary, the reviewed studies consistently showed that men who  
442 have sex with FSWs exhibited high-risk behaviors. Paying for sex was prevalent in studies  
443 involving men in occupations characterized by mobility and extended periods away from their  
444 spouses. Given the gaps in the literature on intervention effectiveness for these groups, future  
445 research should prioritize evaluating HIV prevention strategies tailored to men who have sex  
446 with FSWs. Finally, these findings highlight the importance of targeting subpopulations of men  
447 with interventions rather than solely relying on population-level data.

## 448 **Supporting information**

449 Fig 1: PRISMA\_ScR Flow diagram of the study selection process

450 Fig 2: Number of studies by country and region

451 Fig 3: Sample size, proportion of men engaging with FSWs, and HIV prevalence

452 Fig 4: Condom use among men engaging with FSWs across studies in SSA

453 Fig 5: HIV testing uptake among men engaging with FSWs by study

454 Additional Table 1: PRISMA-ScR Checklist

## 455 **Author Contributions**

456 Conceptualization, G.M., J.H.; E.F. and F.C.; methodology, G.M.; P.M.; J.H.; E.F.; and F.C.;  
457 results, G.M.; discussion, G.M.; J.H.; E.F.; and F.C.; conclusion, G.M.; writing—original draft  
458 preparation, G.M.; writing—review and editing, G.M., J.H.; E.F. and F.C. All authors have read  
459 and agreed to the published version of the manuscript.

460 **Institutional Review Board Statement**

461 Not applicable.

462 **Informed Consent Statement**

463 Not applicable.

464 **Data Availability Statement**

465 Since this study is a scoping review, there is no statistical data set.

466 **Public Involvement Statement**

467 No public involvement in any aspect of this research.

468 **Guidelines and Standards Statement**

469 This manuscript was drafted against the Preferred Reporting Items of Systematic Reviews and

470 Meta-analyses guidelines for review research.

471 **Conflicts of Interest**

472 The authors declare no conflicts of interest.

473 **Funding Statement**

474 This review received no external funding.

475

## 476 **References**

- 477 1. UNAIDS JUNPoHA. 2024 global AIDS report - The Urgency of Now: AIDS at a Crossroads.  
478 2024.
- 479 2. Jones HS, Anderson RL, Cust H, McClelland RS, Richardson BA, Thirumurthy H, et al. HIV  
480 incidence among women engaging in sex work in sub-Saharan Africa: a systematic review and meta-  
481 analysis. medRxiv. 2023:2023.10.17.23297108.
- 482 3. Ali MS, Wit MDE, Chabata ST, Magutshwa S, Musemburi S, Dirawo J, et al. Estimation of HIV  
483 incidence from analysis of HIV prevalence patterns among female sex workers in Zimbabwe. *Aids*.  
484 2022;36(8):1141-50.
- 485 4. Lahuerta M, Wu Y, Hoffman S, Elul B, Kulkarni SG, Remien RH, et al. Advanced HIV disease at  
486 entry into HIV care and initiation of antiretroviral therapy during 2006-2011: findings from four sub-  
487 saharan African countries. *Clin Infect Dis*. 2014;58(3):432-41.
- 488 5. Lopez-Varela E, Augusto O, Fuente-Soro L, Sacoor C, Nhacolo A, Casavant I, et al. Quantifying  
489 the gender gap in the HIV care cascade in southern Mozambique: We are missing the men. *PLoS*  
490 *One*. 2021;16(2):e0245461.
- 491 6. Hlongwa M, Mashamba-Thompson T, Makhunga S, Hlongwana K. Barriers to HIV testing  
492 uptake among men in sub-Saharan Africa: a scoping review. *Afr J AIDS Res*. 2020;19(1):13-23.
- 493 7. Barnard MA, McKeganey NP, Leyland AH. Risk behaviours among male clients of female  
494 prostitutes. *Bmj*. 1993;307(6900):361-2.
- 495 8. Ramjee G, Gouws E. Prevalence of HIV among truck drivers visiting sex workers in KwaZulu-  
496 Natal, South Africa. *Sex Transm Dis*. 2002;29(1):44-9.
- 497 9. Bwayo J, Plummer F, Omari M, Mutere A, Moses S, Ndinya-Achola J, et al. Human  
498 immunodeficiency virus infection in long-distance truck drivers in east Africa. *Arch Intern Med*.  
499 1994;154(12):1391-6.
- 500 10. Bwayo JJ, Omari AM, Mutere AN, Jaoko W, Sekkade-Kigonde C, Kreiss J, et al. Long distance  
501 truck-drivers: 1. Prevalence of sexually transmitted diseases (STDs). *East Afr Med J*. 1991;68(6):425-  
502 9.
- 503 11. Nwokoji UA, Ajuwon AJ. Knowledge of AIDS and HIV risk-related sexual behavior among  
504 Nigerian naval personnel. *BMC Public Health*. 2004;4(1):24.
- 505 12. Vuylsteke BL, Ghys PD, Traoré M, Konan Y, Mah-Bi G, Maurice C, et al. HIV prevalence and  
506 risk behavior among clients of female sex workers in Abidjan, Côte d'Ivoire. *AIDS*. 2003;17(11):1691-  
507 4.
- 508 13. Hong R. Behavior, knowledge, attitude, and other characteristics of men who had sex with  
509 female commercial sex workers in Kenya. *Am J Mens Health*. 2008;2(1):17-24.
- 510 14. Arksey H, O'Malley L. Scoping studies: towards a methodological framework. *International*  
511 *Journal of Social Research Methodology*. 2005;8(1):19-32.
- 512 15. Downes MJ, Brennan ML, Williams HC, Dean RS. Development of a critical appraisal tool to  
513 assess the quality of cross-sectional studies (AXIS). *BMJ Open*. 2016;6(12):e011458.
- 514 16. Gaolaolwe W, Mokgatle MM, Oguntibeju OO. Knowledge on HIV/AIDS and sexual behaviours  
515 among long-distance truck drivers at Kazungula weigh bridge terminal, Chobe District, Botswana.  
516 *African Journal of Biomedical Research*. 2023;26(1):1-12.
- 517 17. Adeoti AO, Desalu OO, Oluwadiya KS. Sexual practices, risk perception and HIV self-testing  
518 acceptability among long-distance truck drivers in Ekiti State, Nigeria. *The Nigerian postgraduate*  
519 *medical journal*. 2021;28(4):273-7.
- 520 18. Lalla-Edward ST, Fischer AE, Venter WDF, Scheuermaier K, Meel R, Hankins C, et al. Cross-  
521 sectional study of the health of southern African truck drivers. *BMJ Open*. 2019;9(10):e032025.

- 522 19. Botão C, Horth RZ, Frank H, Cummings B, Inguane C, Sathane I, et al. Prevalence of HIV and  
523 Associated Risk Factors Among Long Distance Truck Drivers in Inchope, Mozambique, 2012. *AIDS*  
524 *Behav.* 2016;20(4):811-20.
- 525 20. Lakew Y, Tamene H. HIV related risk behaviours among taxi drivers and their assistants in  
526 Addis Ababa, Ethiopia: descriptive cross-sectional survey. *BMC Public Health.* 2014;14(1):330.
- 527 21. Crane Survey G, Lindan CP, Anglemeyer A, Hladik W, Barker J, Lubwama G, et al. High-risk  
528 motorcycle taxi drivers in the HIV/AIDS era: a respondent-driven sampling survey in Kampala,  
529 Uganda. *International Journal of STD & AIDS.* 2015;26(5):336-45.
- 530 22. Baltazar CS, Horth R, Inguane C, Sathane I, César F, Ricardo H, et al. HIV prevalence and risk  
531 behaviors among Mozambicans working in South African mines. *AIDS Behav.* 2015;19 Suppl 1(Suppl  
532 1):S59-67.
- 533 23. Abdissa HG, Lemu YK, Nigussie DT. HIV preventive behavior and associated factors among  
534 mining workers in Sali traditional gold mining site Bench Maji zone, Southwest Ethiopia: a cross  
535 sectional study. *BMC Public Health.* 2014;14(1):1003-.
- 536 24. Tran BR, Davis A, Sloan M, Macera C, Mbuyi AM, Kabanda GK. Alcohol use and sexual risk  
537 behaviors in the Armed Forces of the Democratic Republic of the Congo. *BMC Public Health.*  
538 2019;19(1):1-9.
- 539 25. Roth EA, Ngugi E, Benoit C, Jansson M, Hallgrimsdottir H. A Reasoned Action Model of Male  
540 Client Involvement in Commercial Sex Work in Kibera, A Large Informal Settlement in Nairobi, Kenya.  
541 *Human organization.* 2014;73(2):174-82.
- 542 26. Olaniyan O, Olasehinde N, Akintaro A, Afolabi O. Demand for heterosexual commercial sex  
543 services in Ibadan, Nigeria. *African Population Studies.* 2017;31(2):3737-51.
- 544 27. Fleming PJ, Mulawa M, Burke H, Shattuck D, Mndeme E, Attafuah J, et al. The role of  
545 relationship types on condom use among urban men with concurrent partners in Ghana and  
546 Tanzania. *AIDS Care.* 2015;27(4):466-72.
- 547 28. Tiruneh K, Wasie B, Gonzalez H. Sexual behavior and vulnerability to HIV infection among  
548 seasonal migrant laborers in Metema district, north west Ethiopia: a cross-sectional study. *BMC*  
549 *Public Health.* 2015;15:122.
- 550 29. Hodgins C, Stannah J, Kuchukhidze S, Zembe L, Eaton JW, Boily MC, et al. Population sizes,  
551 HIV prevalence, and HIV prevention among men who paid for sex in sub-Saharan Africa (2000-2020):  
552 A meta-analysis of 87 population-based surveys. *PLoS Med.* 2022;19(1):e1003861.
- 553 30. Delany-Moretlwe S, Bello B, Kinross P, Oliff M, Chersich M, Kleinschmidt I, et al. HIV  
554 prevalence and risk in long-distance truck drivers in South Africa: a national cross-sectional survey.  
555 *International Journal of STD & AIDS.* 2014;25(6):428-38.
- 556 31. Baltazar CS, Horth R, Inguane C, Sathane I, César F, Ricardo H, et al. HIV prevalence and risk  
557 behaviors among Mozambicans working in South African mines. *AIDS and Behavior.* 2015;19 Suppl  
558 1:S59-S67.
- 559 32. Tran BR, Glass N, Tripathi O, Kalombo O, Ibata P, Mpassi RB. Alcohol use and its association  
560 with sexual risk behaviors in the Armed Forces of the Republic of the Congo. *PLoS One.*  
561 2019;14(10):e0223322.
- 562 33. Gaolaolwe W, Mokgatle M. Factors associated with buying sex and the knowledge that  
563 condoms prevent HIV among long-distance truck drivers at Kazungula weighbridge terminal, Chobe  
564 District, Botswana. *African Journal of AIDS Research.* 2023;22(1):35-45.
- 565 34. Muleia R, Banze AR, Damião SL, Baltazar CS. Patterns of inconsistent condom use and risky  
566 sexual behaviors among female sex workers in Mozambique. *BMC Public Health.* 2024;24(1):2711.
- 567 35. Grosso AL, Lei EL, Ketende SC, Peitzmeier S, Mason K, Ceesay N, et al. Correlates of condom  
568 use among female sex workers in The Gambia: results of a cross-sectional survey. *PeerJ.*  
569 2015;3:e1076.
- 570 36. Nardell MF, Govathson C, Mngadi-Ncube S, Ngcobo N, Letswalo D, Lurie M, et al. Migrant  
571 men and HIV care engagement in Johannesburg, South Africa. *BMC Public Health.* 2024;24(1):435.

- 572 37. Adugna DG, Worku MG. HIV testing and associated factors among men (15-64 years) in  
573 Eastern Africa: a multilevel analysis using the recent demographic and health survey. *BMC Public*  
574 *Health*. 2022;22(1):2170.
- 575 38. Sabo KG, Seifu BL, Kase BF, Asebe HA, Asmare ZA, Asgedom YS, et al. Factors influencing HIV  
576 testing uptake in Sub-Saharan Africa: a comprehensive multi-level analysis using demographic and  
577 health survey data (2015–2022). *BMC Infectious Diseases*. 2024;24(1):821.
- 578 39. ILO I, ITF, HEARD & UNAIDS. Sub-regional Workshop on HIV and AIDS in the Transport Sector  
579 in Southern Africa, Johannesburg, 29–30 March. 2011.
- 580 40. Sandøy IF, Zyaambo C, Michelo C, Fylkesnes K. Targeting condom distribution at high risk  
581 places increases condom utilization-evidence from an intervention study in Livingstone, Zambia.  
582 *BMC Public Health*. 2012;12(1):10.
- 583 41. Norr KF, Banda CK, Chang C, Krishna S, Kumbani LC, Liu L, et al. Condom use increased after a  
584 peer group intervention implemented by community volunteers in Malawi. *Res Sq*. 2023.
- 585 42. Hlongwa M, Mashamba-Thompson T, Makhunga S, Hlongwana K. Mapping evidence of  
586 intervention strategies to improving men's uptake to HIV testing services in sub-Saharan Africa: A  
587 systematic scoping review. *BMC Infectious Diseases*. 2019;19(1):496.
- 588 43. Pai N, Esmail A, Saha Chaudhuri P, Oelofse S, Pretorius M, Marathe G, et al. Impact of a  
589 personalised, digital, HIV self-testing app-based program on linkages and new infections in the  
590 township populations of South Africa. *BMJ Glob Health*. 2021;6(9).
- 591 44. Virkud AV, Arimi P, Sengooba F, Mulholland GE, Herce ME, Markiewicz M, et al. Access to  
592 HIV prevention services in East African cross-border areas: a 2016-2017 cross-sectional bio-  
593 behavioural study. *J Int AIDS Soc*. 2020;23 Suppl 3(Suppl 3):e25523.
- 594 45. Herce ME, Miller WM, Bula A, Edwards JK, Sapalalo P, Lancaster KE, et al. Achieving the first  
595 90 for key populations in sub-Saharan Africa through venue-based outreach: challenges and  
596 opportunities for HIV prevention based on PLACE study findings from Malawi and Angola. *J Int AIDS*  
597 *Soc*. 2018;21 Suppl 5(Suppl 5):e25132.
- 598 46. Hensen B, Taoka S, Lewis JJ, Weiss HA, Hargreaves J. Systematic review of strategies to  
599 increase men's HIV-testing in sub-Saharan Africa. *Aids*. 2014;28(14):2133-45.
- 600 47. Ntinga X, Musiello F, Keter AK, Barnabas R, van Heerden A. The Feasibility and Acceptability  
601 of an mHealth Conversational Agent Designed to Support HIV Self-testing in South Africa: Cross-  
602 sectional Study. *J Med Internet Res*. 2022;24(12):e39816.
- 603 48. Tun W, Vu L, Dirisu O, Sekoni A, Shoyemi E, Njab J, et al. Uptake of HIV self-testing and  
604 linkage to treatment among men who have sex with men (MSM) in Nigeria: A pilot programme using  
605 key opinion leaders to reach MSM. *J Int AIDS Soc*. 2018;21 Suppl 5(Suppl 5):e25124.
- 606 49. Sabapathy K, Van den Bergh R, Fidler S, Hayes R, Ford N. Uptake of home-based voluntary  
607 HIV testing in sub-Saharan Africa: a systematic review and meta-analysis. *PLoS Med*.  
608 2012;9(12):e1001351.
- 609 50. Hensen B, Lewis JJ, Schaap A, Tembo M, Mutale W, Weiss HA, et al. Factors associated with  
610 HIV-testing and acceptance of an offer of home-based testing by men in rural Zambia. *AIDS Behav*.  
611 2015;19(3):492-504.
- 612 51. Tanser FC, Kim H-Y, Mathenjwa T, Shahmanesh M, Seeley J, Matthews P, et al. Home-Based  
613 Intervention to Test and Start (HITS): a community-randomized controlled trial to increase HIV  
614 testing uptake among men in rural South Africa. *Journal of the International AIDS Society*.  
615 2021;24(2):e25665.
- 616 52. Sharma M, Barnabas RV, Celum C. Community-based strategies to strengthen men's  
617 engagement in the HIV care cascade in sub-Saharan Africa. *PLoS Med*. 2017;14(4):e1002262.
- 618 53. Hatzold K, Gudukeya S, Mutseta MN, Chilongosi R, Nalubamba M, Nkhoma C, et al. HIV self-  
619 testing: breaking the barriers to uptake of testing among men and adolescents in sub-Saharan Africa,  
620 experiences from STAR demonstration projects in Malawi, Zambia and Zimbabwe. *J Int AIDS Soc*.  
621 2019;22 Suppl 1(Suppl 1):e25244.

- 622 54. Mweemba O, Maman S. The secondary distribution of HIV self-testing kits. *The Lancet Global*  
623 *Health*. 2021;9(7):e891-e2.
- 624 55. Choko AT, Corbett EL, Stallard N, Maheswaran H, Lepine A, Johnson CC, et al. HIV self-testing  
625 alone or with additional interventions, including financial incentives, and linkage to care or  
626 prevention among male partners of antenatal care clinic attendees in Malawi: An adaptive multi-  
627 arm, multi-stage cluster randomised trial. *PLoS Med*. 2019;16(1):e1002719.
- 628 56. de Gruchy T, Kapilashrami A. After the handover: Exploring MSF's role in the provision of  
629 health care to migrant farm workers in Musina, South Africa. *Global Public Health*.  
630 2019;14(10):1401-13.
- 631 57. Gruchy Td, Vearey J. "Left behind": why implementing migration-aware responses to HIV for  
632 migrant farm workers is a priority for South Africa. *African Journal of AIDS Research*. 2020;19(1):57-  
633 68.
- 634 58. Thomas AG, Grillo MP, Djibo DA, Hale B, Shaffer RA. Military HIV Policy Assessment in Sub-  
635 Saharan Africa. *Military Medicine*. 2014;179(7):773-7.
- 636 59. Shapiro AE, van Heerden A, Krows M, Sausi K, Sithole N, Schaafsma TT, et al. An  
637 implementation study of oral and blood-based HIV self-testing and linkage to care among men in  
638 rural and peri-urban KwaZulu-Natal, South Africa. *J Int AIDS Soc*. 2020;23 Suppl 2(Suppl 2):e25514.
- 639 60. Muwanguzi PA, Bollinger RC, Ray SC, Nelson LE, Kiwanuka N, Bauermeister JA, et al. Drivers  
640 and barriers to workplace-based HIV self-testing among high-risk men in Uganda: a qualitative study.  
641 *BMC Public Health*. 2021;21(1):1002.
- 642 61. UNAIDS JUNPoHA. Male engagement in HIV testing, treatment and prevention in eastern  
643 and southern Africa — A framework for action. 2022.
- 644 62. van Rooyen H, McGrath N, Chirowodza A, Joseph P, Fiamma A, Gray G, et al. Mobile VCT:  
645 reaching men and young people in urban and rural South African pilot studies (NIMH Project Accept,  
646 HPTN 043). *AIDS Behav*. 2013;17(9):2946-53.
- 647 63. Lalla-Edward ST, Ncube S, Matthew P, Hankins CA, Venter WDF, Gomez GB. Uptake of health  
648 services among truck drivers in South Africa: analysis of routine data from nine roadside wellness  
649 centres. *BMC Health Services Research*. 2017;17(1):649.
- 650 64. Gill MM, Bakebua W, Ditekemena J, Gbomosa CN, Tshishi D, Loando A, et al. Virological and  
651 care outcomes of community ART distribution: Experience with the PODI+ model in Kinshasa,  
652 Democratic Republic of the Congo. *PLOS Glob Public Health*. 2024;4(1):e0002343.
- 653 65. Bochner AF, Meacham E, Mhungu N, Manyanga P, Petracca F, Muserere C, et al. The rollout  
654 of Community ART Refill Groups in Zimbabwe: a qualitative evaluation. *J Int AIDS Soc*.  
655 2019;22(8):e25393.
- 656 66. Kibira SPS, Nansubuga E, Tumwesigye NM, Atuyambe LM, Makumbi F. Differences in risky  
657 sexual behaviors and HIV prevalence of circumcised and uncircumcised men in Uganda: evidence  
658 from a 2011 cross-sectional national survey. *Reproductive Health*. 2014;11(1):1-14.
- 659 67. Kiene SM, Sileo KM, Dove M, Kintu M. Hazardous alcohol consumption and alcohol-related  
660 problems are associated with unknown and HIV-positive status in fishing communities in Uganda.  
661 *AIDS Care*. 2019;31(4):451-9.
- 662 68. Zungu NP, Simbayi LC, Mabaso M, Evans M, Zuma K, Ncitakalo N, et al. HIV risk perception  
663 and behavior among medically and traditionally circumcised males in South Africa. *BMC Public*  
664 *Health*. 2016;16(1):1-7.
- 665 69. Keetile M. An assessment of sexual risk behaviours among circumcised and uncircumcised  
666 men before and after the implementation of the safe male circumcision programme in Botswana.  
667 *AIDS Care*. 2020;32(12):1594-601.
- 668 70. Reynolds HW, Luseno WK, Speizer IS. Consistent condom use among men with non-marital  
669 partners in four sub-Saharan African countries. *AIDS Care*. 2013;25(5):592-600.
- 670 71. Luchters S, Richter ML, Bosire W, Nelson G, Kingola N, Zhang X, et al. The contribution of  
671 emotional partners to sexual risk taking and violence among female sex workers in Mombasa,  
672 Kenya: a cohort study. *PLoS One*. 2013;8(8):e68855.

- 673 72. Macicame I, Bhatt N, Matavele Chissumba R, Eller LA, Viegas E, Araújo K, et al. HIV  
674 prevalence and risk behavior among male and female adults screened for enrolment into a vaccine  
675 preparedness study in Maputo, Mozambique. *PLoS One*. 2019;14(9):e0221682.
- 676 73. Gutin SA, Neilands TB, Charlebois ED, Getahun M, Okiring J, Akullian A, et al. Mobility is  
677 Associated with Higher-risk Sexual Partnerships Among Both Men and Women in Co-resident  
678 Couples in Rural Kenya and Uganda: A Longitudinal Cohort Study. *AIDS and Behavior*.  
679 2023;27(5):1418-29.
- 680 74. Githuka G, Hladik W, Mwalili S, Cherutich P, Muthui M, Gitonga J, et al. Populations at  
681 increased risk for HIV infection in Kenya: results from a national population-based household survey,  
682 2012. *JAIDS, Journal of Acquired Immune Deficiency Syndromes*. 2014;66(Suppl. 1):S46-S56.
- 683 75. Kankaka EN, Ssekasanvu J, Prodger J, Nabukalu D, Nakawooya H, Ndyanabo A, et al. Sexual  
684 risk behaviors following circumcision among HIV-positive men in Rakai, Uganda. *AIDS Care*.  
685 2018;30(8):990-6.
- 686 76. Mooney A, Kidanu A, Bradley HM, Kumoji EK, Kennedy CE, Kerrigan D. Work-related violence  
687 and inconsistent condom use with non-paying partners among female sex workers in Adama City,  
688 Ethiopia. *BMC Public Health*. 2013;13:771.
- 689 77. Govender K, Beckett S, Masebo W, Braga C, Zambezi P, Manhique M, et al. Effects of a Short  
690 Message Service (SMS) Intervention on Reduction of HIV Risk Behaviours and Improving HIV Testing  
691 Rates Among Populations located near Roadside Wellness Clinics: A Cluster Randomised Controlled  
692 Trial in South Africa, Zimbabwe and Mozambique. *AIDS and Behavior*. 2019;23(11):3119-28.
- 693 78. Kuteesa MO, Seeley J, Weiss HA, Cook S, Kamali A, Webb EL. Alcohol Misuse and Illicit Drug  
694 Use Among Occupational Groups at High Risk of HIV in Sub-Saharan Africa: A Systematic Review.  
695 *AIDS and Behavior*. 2019;23(12):3199-225.
- 696 79. Kibira SPS, Sandøy IF, Daniel M, Atuyambe LM, Makumbi FE. A comparison of sexual risk  
697 behaviours and HIV seroprevalence among circumcised and uncircumcised men before and after  
698 implementation of the safe male circumcision programme in Uganda. *BMC Public Health*.  
699 2016;16(1):7.
- 700 80. Ahinkorah BO, Budu E, Seidu A-A, Hagan JE, Jr., Agbaglo E, Hormenu T, et al. Consistent  
701 condom use among men who pay for sex in sub-Saharan Africa: Empirical evidence from  
702 Demographic and Health Surveys. *PLoS One*. 2020;15(8):e0236552.
- 703 81. Hodgins C, Stannah J, Kuchukhidze S, Zembe L, Eaton JW, Boily M-C, et al. Population sizes,  
704 HIV prevalence, and HIV prevention among men who paid for sex in sub-Saharan Africa (2000-2020):  
705 A meta-analysis of 87 population-based surveys. *PLoS Medicine*. 2022;19(1):e1003861.
- 706 82. Prudden HJ, Beattie TS, Bobrova N, Panovska-Griffiths J, Mukandavire Z, Gorgens M, et al.  
707 Factors Associated with Variations in Population HIV Prevalence across West Africa: Findings from an  
708 Ecological Analysis. *PLoS One*. 2015;10(12):e0142601.
- 709 83. Waruru A, Achia TNO, Tobias JL, Ng'ang'a J, Mwangi M, Wamicwe J, et al. Finding hidden HIV  
710 clusters to support geographic-oriented HIV interventions in Kenya. *JAIDS, Journal of Acquired  
711 Immune Deficiency Syndromes*. 2018;78(2):144-54.
- 712 84. Closson K, Hatcher A, Sikweyiya Y, Washington L, Mkhwanazi S, Jewkes R, et al. Gender role  
713 conflict and sexual health and relationship practices amongst young men living in urban informal  
714 settlements in South Africa. *Culture, Health & Sexuality*. 2020;22(1):31-47.
- 715 85. Chemaitelly H, Weiss HA, Calvert C, Harfouche M, Abu-Raddad LJ. HIV epidemiology among  
716 female sex workers and their clients in the Middle East and North Africa: systematic review, meta-  
717 analyses, and meta-regressions. *BMC medicine*. 2019;17(1):119.
- 718 86. Gebremedhin AT, Gesesew HA, Demissie TD, Kerie MW, Sudhakar M. Khat chewing and risky  
719 sexual behavior in Sub-Saharan Africa: a systematic review protocol. *JBHI Database of Systematic  
720 Reviews & Implementation Reports*. 2013;11(12):59-67.
- 721 87. Babirye S, Ssenooba F, Weir SS, Michielsen K. Social venues and HIV vulnerability of young  
722 venue workers: a cluster analysis of data from a national-level cross-sectional survey of social venues  
723 in Uganda. *BMJ Open*. 2023;13(5):e065239.

- 724 88. Leung Soo C, Pant Pai N, Bartlett SJ, Esmail A, Dheda K, Bhatnagar S. Socioeconomic factors  
725 impact the risk of HIV acquisition in the township population of South Africa: A Bayesian analysis.  
726 PLOS global public health. 2023;3(1):e0001502.
- 727 89. Shi C, Li M, Dushoff J. Traditional Male Circumcision is Associated with Sexual Risk Behaviors  
728 in Sub-Saharan Countries Prioritized for Male Circumcision. AIDS & Behavior. 2020;24(3):951-9.
- 729 90. George G, Chetty T, Strauss M, Inoti S, Kinyanjui S, Mwai E, et al. Costing analysis of an SMS-  
730 based intervention to promote HIV self-testing amongst truckers and sex workers in Kenya. PLoS  
731 One. 2018;13(7):e0197305.
- 732 91. Papworth E, Ceesay N, An L, Thiam-Niangoin M, Ky-Zerbo O, Holland C, et al. Epidemiology  
733 of HIV among female sex workers, their clients, men who have sex with men and people who inject  
734 drugs in West and Central Africa. Journal of the International AIDS Society. 2013;16 Suppl 3:18751.
- 735 92. Yedemie YY. Evaluating the prevalence and patterns of sexual risk behavior among  
736 undergraduate university students in Ethiopia: implication for psychosocial intervention.  
737 International Quarterly of Community Health Education. 2020;41(1):63-7.
- 738 93. Grillo M, Tran BR, Tamoufe U, Djoko CF, Saylor K, Woodland K, et al. HIV and Syphilis  
739 Prevalence and Associated Risks in the Cameroonian Armed Forces. Current HIV research.  
740 2017;15(2):137-45.
- 741 94. Rucinski K, Masankha Banda L, Olawore O, Akolo C, Zakaliya A, Chilongozi D, et al. HIV  
742 Testing Approaches to Optimize Prevention and Treatment for Key and Priority Populations in  
743 Malawi. Open forum infectious diseases. 2022;9(4):ofac038.
- 744 95. Nabifo SC, Tsai AC, Bajunirwe F. HIV-related stigma and its association with HIV transmission  
745 risk behaviors among boda boda motorcyclists in Mbarara Municipality, southwestern Uganda. Int J  
746 STD AIDS. 2021;32(9):791-8.
- 747 96. Mulugeta A, Manay K, Yifokir T, Ansha N, Solomon M, Sharma HR. HIV/AIDS risk perception  
748 and behavior of college students of the Metekel Zone, Benishangul Gumuz regional state, Ethiopia.  
749 Vulnerable Children and Youth Studies. 2016;11(2):180-92.
- 750 97. Zhou W, Deng W, Luo J, Bai Y, He Z, Wang H. Predictors for HIV testing among Chinese  
751 workers in infrastructure construction enterprises in Kenya. BMC Public Health. 2021;21(1):2213.
- 752 98. Mbita G, Komba AN, Casalini C, Bazant E, Curran K, Christensen A, et al. Predictors of HIV  
753 Among 1 Million Clients in High-Risk Male Populations in Tanzania. AIDS & Behavior.  
754 2022;26(10):3185-98.
- 755 99. Keita M, Traore AK, Dicko I, Coulibaly YI, Maïga A, Bagayoko B, et al. [Role Of Emigration In  
756 The Spread Of HIV Infection In The Region Of Kayes, Mali]. Le Mali medical. 2013;28(2):46-52.
- 757 100. Pelders J, Nelson G. Socio-demographic contributors to health and safety of mine workers in  
758 South Africa. Work. 2019;64(1):67-76.
- 759 101. Choudhry V, Ambresin A-E, Nyakato VN, Agardh A. Transactional sex and HIV risks - evidence  
760 from a cross-sectional national survey among young people in Uganda. Global Health Action.  
761 2015;8:27249.
- 762 102. Kagaayi J, Batte J, Nakawooya H, Kigozi B, Nakigozi G, Strömdahl S, et al. Uptake and  
763 retention on HIV pre-exposure prophylaxis among key and priority populations in South-Central  
764 Uganda. Journal of the International AIDS Society. 2020;23(8).
- 765 103. Busza J, Hensen B, Birdthistle I, Chabata ST, Hargreaves JR, Floyd S, et al. What's in a name?  
766 A mixed method study on how young women who sell sex characterize male partners and their use  
767 of condoms. JAIDS, Journal of Acquired Immune Deficiency Syndromes. 2021;87(1):652-62.
- 768 104. Falcao J, Ahoua L, Zerbe A, di Mattei P, Baggaley R, Chivurre V, et al. Willingness to use  
769 short-term oral pre-exposure prophylaxis (PrEP) by migrant miners and female partners of migrant  
770 miners in Mozambique. Culture, Health & Sexuality. 2017;19(12):1389-403.
- 771 105. Matovu JKB, Ssebadduka NB. Knowledge, attitudes & barriers to condom use among  
772 female sex workers and truck drivers in Uganda: a mixed-methods study. African health sciences.  
773 2013;13(4):1027-33.



774 106. Getahun K, Alemayehu K, Ararso T, Solomon A, Sharma HR, Amit A. HIV/AIDS prevention  
775 practices among military personnel in Northwest Ethiopia. *AIDS Care*. 2019;31(11):1384-8.  
776 107. Yaya I, Landoh DE, Saka B, Vignikin K, Aboubakari A-S, N'Dri KM, et al. Consistent Condom  
777 Use during Casual Sex among Long-Truck Drivers in Togo. *PLoS One*. 2016;11(4):e0153264.  
778 108. Idris SH, Sambo MN, Obi P. Comportment of heavy goods vehicle drivers in HIV spread along  
779 settlements around Kaduna: Kano road transport corridor in Nigeria. *International Journal of*  
780 *Medicine and Public Health*. 2013;3(1):26-32.  
781 109. Tran BR, Thomas AG, Ditsela M, Vaida F, Phetogo R, Kelapile D, et al. Condom use behaviours  
782 and correlates of use in the Botswana Defence Force. *International Journal of STD & AIDS*.  
783 2013;24(11):883-92.

784

785

786

787

788

789

790 S1 APPENDIX: APPRAISAL TOOL FOR CROSS-SECTIONAL STUDIES (AXIS)

| <b>1. Alcohol use and sexual risk behaviours in the Armed Forces of the Democratic Republic of Congo (DRC)</b> |                                                                                                                                                    |            |           |                                                |
|----------------------------------------------------------------------------------------------------------------|----------------------------------------------------------------------------------------------------------------------------------------------------|------------|-----------|------------------------------------------------|
|                                                                                                                | <b>Question</b>                                                                                                                                    | <b>Yes</b> | <b>No</b> | <b>Don't know/ Comment</b>                     |
| <b><i>Introduction</i></b>                                                                                     |                                                                                                                                                    |            |           |                                                |
| 1                                                                                                              | Were the aims/objectives of the study clear?                                                                                                       | Yes        |           |                                                |
| <b><i>Methods</i></b>                                                                                          |                                                                                                                                                    |            |           |                                                |
| 2                                                                                                              | Was the study design appropriate for the stated aim(s)?                                                                                            |            | No        | Convenience sample is non-probabilistic        |
| 3                                                                                                              | Was the sample size justified?                                                                                                                     |            | No        |                                                |
| 4                                                                                                              | Was the target/reference population clearly defined? (Is it clear who the research was about?)                                                     | Yes        |           |                                                |
| 5                                                                                                              | Was the sample frame taken from an appropriate population base so that it closely represented the target/reference population under investigation? |            | No        | Non-representative because of biased selection |
| 6                                                                                                              | Was the selection process likely to select subjects/participants that were representative of the target/reference population under investigation?  |            | No        |                                                |
| 7                                                                                                              | Were measures undertaken to address and categorise non-responders?                                                                                 |            | No        |                                                |

|                   |                                                                                                                                                       |     |    |                                    |
|-------------------|-------------------------------------------------------------------------------------------------------------------------------------------------------|-----|----|------------------------------------|
| 8                 | Were the risk factor and outcome variables measured appropriate to the aims of the study?                                                             | Yes |    |                                    |
| 9                 | Were the risk factor and outcome variables measured correctly using instruments/measurements that had been trialled, piloted or published previously? |     |    | I do not know since its not stated |
| 10                | Is it clear what was used to determined statistical significance and/or precision estimates? (e.g. p-values, confidence intervals)                    | Yes |    |                                    |
| 11                | Were the methods (including statistical methods) sufficiently described to enable them to be repeated?                                                | Yes |    |                                    |
| <b>Results</b>    |                                                                                                                                                       |     |    |                                    |
| 12                | Were the basic data adequately described?                                                                                                             | Yes |    |                                    |
| 13                | Does the response rate raise concerns about non-response bias?                                                                                        |     | No |                                    |
| 14                | If appropriate, was information about non-responders described?                                                                                       |     | No |                                    |
| 15                | Were the results internally consistent?                                                                                                               | Yes |    |                                    |
| 16                | Were the results presented for all the analyses described in the methods?                                                                             | Yes |    |                                    |
| <b>Discussion</b> |                                                                                                                                                       |     |    |                                    |
| 17                | Were the authors' discussions and conclusions justified by the results?                                                                               | Yes |    |                                    |
| 18                | Were the limitations of the study discussed?                                                                                                          | Yes |    |                                    |

| <b>Other</b> |                                                                                                                     |     |    |                                               |
|--------------|---------------------------------------------------------------------------------------------------------------------|-----|----|-----------------------------------------------|
| 19           | Were there any funding sources or conflicts of interest that may affect the authors' interpretation of the results? |     | No | The authors declared no conflicts of interest |
| 20           | Was ethical approval or consent of participants attained?                                                           | Yes |    |                                               |

791

| <b>2. High-risk motorcycle taxi drivers in the HIV/AIDS era: a respondent-driven sampling survey in Kampala, Uganda</b> |                                                                                                                                                    |            |           |                                   |
|-------------------------------------------------------------------------------------------------------------------------|----------------------------------------------------------------------------------------------------------------------------------------------------|------------|-----------|-----------------------------------|
|                                                                                                                         | <b>Question</b>                                                                                                                                    | <b>Yes</b> | <b>No</b> | <b>Don't know/ Comment</b>        |
| <b>Introduction</b>                                                                                                     |                                                                                                                                                    |            |           |                                   |
| 1                                                                                                                       | Were the aims/objectives of the study clear?                                                                                                       | Yes        |           |                                   |
| <b>Methods</b>                                                                                                          |                                                                                                                                                    |            |           |                                   |
| 2                                                                                                                       | Was the study design appropriate for the stated aim(s)?                                                                                            | Yes        | o         | Network population                |
| 3                                                                                                                       | Was the sample size justified?                                                                                                                     | Yes        |           | Sample size calculation conducted |
| 4                                                                                                                       | Was the target/reference population clearly defined? (Is it clear who the research was about?)                                                     | Yes        |           |                                   |
| 5                                                                                                                       | Was the sample frame taken from an appropriate population base so that it closely represented the target/reference population under investigation? | Yes        |           |                                   |
|                                                                                                                         | Was the selection process likely to select                                                                                                         | Yes        |           |                                   |

|                |                                                                                                                                                        |     |    |  |
|----------------|--------------------------------------------------------------------------------------------------------------------------------------------------------|-----|----|--|
| 6              | subjects/participants that were representative of the target/reference population under investigation?                                                 |     |    |  |
| 7              | Were measures undertaken to address and categorise non-responders?                                                                                     |     | No |  |
| 8              | Were the risk factor and outcome variables measured appropriate to the aims of the study?                                                              | Yes |    |  |
| 9              | Were the risk factor and outcome variables measured correctly using instruments/measurements that had been trialled, piloted, or published previously? | Yes |    |  |
| 10             | Is it clear what was used to determine statistical significance and/or precision estimates? (e.g. p-values, confidence intervals)                      | Yes |    |  |
| 11             | Were the methods (including statistical methods) sufficiently described to enable them to be repeated?                                                 | Yes |    |  |
| <b>Results</b> |                                                                                                                                                        |     |    |  |
| 12             | Were the basic data adequately described?                                                                                                              | Yes |    |  |
| 13             | Does the response rate raise concerns about non-response bias?                                                                                         |     | No |  |
| 14             | If appropriate, was information about non-responders described?                                                                                        |     | No |  |
| 15             | Were the results internally consistent?                                                                                                                | Yes |    |  |
| 16             | Were the results presented for all the analyses described in the methods?                                                                              | Yes |    |  |

| <b>Discussion</b> |                                                                                                                     |     |    |                                               |
|-------------------|---------------------------------------------------------------------------------------------------------------------|-----|----|-----------------------------------------------|
| 17                | Were the authors' discussions and conclusions justified by the results?                                             | Yes |    |                                               |
| 18                | Were the limitations of the study discussed?                                                                        | Yes |    |                                               |
| <b>Other</b>      |                                                                                                                     |     |    |                                               |
| 19                | Were there any funding sources or conflicts of interest that may affect the authors' interpretation of the results? |     | No | The authors declared no conflicts of interest |
| 20                | Was ethical approval or consent of participants attained?                                                           | Yes |    |                                               |

792

| <b>3. The role of relationship types on condom use among urban men with concurrent partners in Ghana and Tanzania</b> |                                                                                                |            |           |                                   |
|-----------------------------------------------------------------------------------------------------------------------|------------------------------------------------------------------------------------------------|------------|-----------|-----------------------------------|
|                                                                                                                       | <b>Question</b>                                                                                | <b>Yes</b> | <b>No</b> | <b>Don't know/ Comment</b>        |
| <b>Introduction</b>                                                                                                   |                                                                                                |            |           |                                   |
| 1                                                                                                                     | Were the aims/objectives of the study clear?                                                   | Yes        |           |                                   |
| <b>Methods</b>                                                                                                        |                                                                                                |            |           |                                   |
| 2                                                                                                                     | Was the study design appropriate for the stated aim(s)?                                        | Yes        |           | Time location sampling            |
| 3                                                                                                                     | Was the sample size justified?                                                                 | Yes        |           | Sample size calculation conducted |
| 4                                                                                                                     | Was the target/reference population clearly defined? (Is it clear who the research was about?) | Yes        |           |                                   |

|                |                                                                                                                                                        |     |    |                                        |
|----------------|--------------------------------------------------------------------------------------------------------------------------------------------------------|-----|----|----------------------------------------|
| 5              | Was the sample frame taken from an appropriate population base so that it closely represented the target/reference population under investigation?     | Yes |    |                                        |
| 6              | Was the selection process likely to select subjects/participants that were representative of the target/reference population under investigation?      | Yes |    |                                        |
| 7              | Were measures undertaken to address and categorise non-responders?                                                                                     |     |    | I do not know since it's not mentioned |
| 8              | Were the risk factor and outcome variables measured appropriate to the aims of the study?                                                              | Yes |    |                                        |
| 9              | Were the risk factor and outcome variables measured correctly using instruments/measurements that had been trialled, piloted, or published previously? |     |    | I do not know                          |
| 10             | Is it clear what was used to determine statistical significance and/or precision estimates? (e.g. p-values, confidence intervals)                      | Yes |    |                                        |
| 11             | Were the methods (including statistical methods) sufficiently described to enable them to be repeated?                                                 | Yes |    |                                        |
| <b>Results</b> |                                                                                                                                                        |     |    |                                        |
| 12             | Were the basic data adequately described?                                                                                                              | Yes |    |                                        |
| 13             | Does the response rate raise concerns about non-response bias?                                                                                         |     | No |                                        |
| 14             | If appropriate, was information about non-responders                                                                                                   |     | No |                                        |

|                   |                                                                                                                     |     |  |                                     |
|-------------------|---------------------------------------------------------------------------------------------------------------------|-----|--|-------------------------------------|
|                   | described?                                                                                                          |     |  |                                     |
| 15                | Were the results internally consistent?                                                                             | Yes |  |                                     |
| 16                | Were the results presented for all the analyses described in the methods?                                           | Yes |  |                                     |
| <b>Discussion</b> |                                                                                                                     |     |  |                                     |
| 17                | Were the authors' discussions and conclusions justified by the results?                                             | Yes |  |                                     |
| 18                | Were the limitations of the study discussed?                                                                        | Yes |  |                                     |
| <b>Other</b>      |                                                                                                                     |     |  |                                     |
| 19                | Were there any funding sources or conflicts of interest that may affect the authors' interpretation of the results? |     |  | I do not know since it's not stated |
| 20                | Was ethical approval or consent of participants attained?                                                           | Yes |  |                                     |

793

|                                                                                                                                                      |                                                         |            |           |                            |
|------------------------------------------------------------------------------------------------------------------------------------------------------|---------------------------------------------------------|------------|-----------|----------------------------|
| <b>4. Sexual behaviour and vulnerability to HIV infection among seasonal migrant in Metema district, northwest Ethiopia: a cross-sectional study</b> |                                                         |            |           |                            |
|                                                                                                                                                      | <b>Question</b>                                         | <b>Yes</b> | <b>No</b> | <b>Don't know/ Comment</b> |
| <b>Introduction</b>                                                                                                                                  |                                                         |            |           |                            |
| 1                                                                                                                                                    | Were the aims/objectives of the study clear?            | Yes        |           |                            |
| <b>Methods</b>                                                                                                                                       |                                                         |            |           |                            |
| 2                                                                                                                                                    | Was the study design appropriate for the stated aim(s)? | Yes        |           | Multi-stage sampling       |



|                |                                                                                                                                                        |     |  |                                        |
|----------------|--------------------------------------------------------------------------------------------------------------------------------------------------------|-----|--|----------------------------------------|
| 3              | Was the sample size justified?                                                                                                                         | Yes |  | Sample size calculation conducted      |
| 4              | Was the target/reference population clearly defined? (Is it clear who the research was about?)                                                         | Yes |  |                                        |
| 5              | Was the sample frame taken from an appropriate population base so that it closely represented the target/reference population under investigation?     | Yes |  |                                        |
| 6              | Was the selection process likely to select subjects/participants that were representative of the target/reference population under investigation?      | Yes |  |                                        |
| 7              | Were measures undertaken to address and categorise non-responders?                                                                                     |     |  | I do not know since it's not mentioned |
| 8              | Were the risk factor and outcome variables measured appropriate to the aims of the study?                                                              | Yes |  |                                        |
| 9              | Were the risk factor and outcome variables measured correctly using instruments/measurements that had been trialled, piloted, or published previously? | Yes |  | Pretested questionnaire                |
| 10             | Is it clear what was used to determine statistical significance and/or precision estimates? (e.g. p-values, confidence intervals)                      | Yes |  |                                        |
| 11             | Were the methods (including statistical methods) sufficiently described to enable them to be repeated?                                                 | Yes |  |                                        |
| <b>Results</b> |                                                                                                                                                        |     |  |                                        |

|                   |                                                                                                                     |     |    |                                               |
|-------------------|---------------------------------------------------------------------------------------------------------------------|-----|----|-----------------------------------------------|
| 12                | Were the basic data adequately described?                                                                           | Yes |    |                                               |
| 13                | Does the response rate raise concerns about non-response bias?                                                      |     | No |                                               |
| 14                | If appropriate, was information about non-responders described?                                                     |     | No |                                               |
| 15                | Were the results internally consistent?                                                                             | Yes |    |                                               |
| 16                | Were the results presented for all the analyses described in the methods?                                           | Yes |    |                                               |
| <b>Discussion</b> |                                                                                                                     |     |    |                                               |
| 17                | Were the authors' discussions and conclusions justified by the results?                                             | Yes |    |                                               |
| 18                | Were the limitations of the study discussed?                                                                        | Yes |    |                                               |
| <b>Other</b>      |                                                                                                                     |     |    |                                               |
| 19                | Were there any funding sources or conflicts of interest that may affect the authors' interpretation of the results? |     | No | The authors declared no conflict of interests |
| 20                | Was ethical approval or consent of participants attained?                                                           | Yes |    |                                               |

794

|                                                                                                                                            |                 |            |           |                            |
|--------------------------------------------------------------------------------------------------------------------------------------------|-----------------|------------|-----------|----------------------------|
| <b>5. HIV related risk behaviours among taxi drivers and their assistants in Addis Ababa, Ethiopia: descriptive cross-sectional survey</b> |                 |            |           |                            |
|                                                                                                                                            | <b>Question</b> | <b>Yes</b> | <b>No</b> | <b>Don't know/ Comment</b> |

| <b><i>Introduction</i></b> |                                                                                                                                                        |     |                                        |
|----------------------------|--------------------------------------------------------------------------------------------------------------------------------------------------------|-----|----------------------------------------|
| 1                          | Were the aims/objectives of the study clear?                                                                                                           | Yes |                                        |
| <b><i>Methods</i></b>      |                                                                                                                                                        |     |                                        |
| 2                          | Was the study design appropriate for the stated aim(s)?                                                                                                | Yes | Multi-stage sampling                   |
| 3                          | Was the sample size justified?                                                                                                                         | Yes | Sample size calculation conducted      |
| 4                          | Was the target/reference population clearly defined? (Is it clear who the research was about?)                                                         | Yes |                                        |
| 5                          | Was the sample frame taken from an appropriate population base so that it closely represented the target/reference population under investigation?     | Yes |                                        |
| 6                          | Was the selection process likely to select subjects/participants that were representative of the target/reference population under investigation?      | Yes |                                        |
| 7                          | Were measures undertaken to address and categorise non-responders?                                                                                     |     | I do not know since it's not mentioned |
| 8                          | Were the risk factor and outcome variables measured appropriate to the aims of the study?                                                              | Yes |                                        |
| 9                          | Were the risk factor and outcome variables measured correctly using instruments/measurements that had been trialled, piloted, or published previously? | Yes | Pretested questionnaire                |
| 10                         | Is it clear what was used to determine statistical significance and/or precision estimates? (e.g. p-values, confidence                                 | Yes |                                        |

|                   |                                                                                                                     |     |    |                                               |
|-------------------|---------------------------------------------------------------------------------------------------------------------|-----|----|-----------------------------------------------|
|                   | intervals)                                                                                                          |     |    |                                               |
| 11                | Were the methods (including statistical methods) sufficiently described to enable them to be repeated?              | Yes |    |                                               |
| <b>Results</b>    |                                                                                                                     |     |    |                                               |
| 12                | Were the basic data adequately described?                                                                           | Yes |    |                                               |
| 13                | Does the response rate raise concerns about non-response bias?                                                      |     | No |                                               |
| 14                | If appropriate, was information about non-responders described?                                                     |     | No |                                               |
| 15                | Were the results internally consistent?                                                                             | Yes |    |                                               |
| 16                | Were the results presented for all the analyses described in the methods?                                           | Yes |    |                                               |
| <b>Discussion</b> |                                                                                                                     |     |    |                                               |
| 17                | Were the authors' discussions and conclusions justified by the results?                                             | Yes |    |                                               |
| 18                | Were the limitations of the study discussed?                                                                        | Yes |    |                                               |
| <b>Other</b>      |                                                                                                                     |     |    |                                               |
| 19                | Were there any funding sources or conflicts of interest that may affect the authors' interpretation of the results? |     | No | The authors declared no conflict of interests |
| 20                | Was ethical approval or consent of participants attained?                                                           | Yes |    |                                               |

795

**6. Prevalence of HIV and associated risk factors among long-distance truck**

| <b>drivers in Inchope, Mozambique</b> |                                                                                                                                                    |            |           |                                        |
|---------------------------------------|----------------------------------------------------------------------------------------------------------------------------------------------------|------------|-----------|----------------------------------------|
|                                       | <b>Question</b>                                                                                                                                    | <b>Yes</b> | <b>No</b> | <b>Don't know/ Comment</b>             |
| <b><i>Introduction</i></b>            |                                                                                                                                                    |            |           |                                        |
| 1                                     | Were the aims/objectives of the study clear?                                                                                                       | Yes        |           |                                        |
| <b><i>Methods</i></b>                 |                                                                                                                                                    |            |           |                                        |
| 2                                     | Was the study design appropriate for the stated aim(s)?                                                                                            | Yes        |           | Time location sampling                 |
| 3                                     | Was the sample size justified?                                                                                                                     | Yes        |           | Sample size calculation conducted      |
| 4                                     | Was the target/reference population clearly defined? (Is it clear who the research was about?)                                                     | Yes        |           |                                        |
| 5                                     | Was the sample frame taken from an appropriate population base so that it closely represented the target/reference population under investigation? | Yes        |           |                                        |
| 6                                     | Was the selection process likely to select subjects/participants that were representative of the target/reference population under investigation?  | Yes        |           |                                        |
| 7                                     | Were measures undertaken to address and categorise non-responders?                                                                                 |            |           | I do not know since it's not mentioned |
| 8                                     | Were the risk factor and outcome variables measured appropriate to the aims of the study?                                                          | Yes        |           |                                        |

|                   |                                                                                                                                                        |     |    |                          |
|-------------------|--------------------------------------------------------------------------------------------------------------------------------------------------------|-----|----|--------------------------|
| 9                 | Were the risk factor and outcome variables measured correctly using instruments/measurements that had been trialled, piloted, or published previously? |     | No |                          |
| 10                | Is it clear what was used to determine statistical significance and/or precision estimates? (e.g. p-values, confidence intervals)                      | Yes |    |                          |
| 11                | Were the methods (including statistical methods) sufficiently described to enable them to be repeated?                                                 | Yes |    |                          |
| <b>Results</b>    |                                                                                                                                                        |     |    |                          |
| 12                | Were the basic data adequately described?                                                                                                              | Yes |    |                          |
| 13                | Does the response rate raise concerns about non-response bias?                                                                                         |     | No |                          |
| 14                | If appropriate, was information about non-responders described?                                                                                        |     | No |                          |
| 15                | Were the results internally consistent?                                                                                                                | Yes |    |                          |
| 16                | Were the results presented for all the analyses described in the methods?                                                                              | Yes |    |                          |
| <b>Discussion</b> |                                                                                                                                                        |     |    |                          |
| 17                | Were the authors' discussions and conclusions justified by the results?                                                                                | Yes |    |                          |
| 18                | Were the limitations of the study discussed?                                                                                                           | Yes |    |                          |
| <b>Other</b>      |                                                                                                                                                        |     |    |                          |
|                   | Were there any funding sources or conflicts of interest that                                                                                           |     |    | I do not know since it's |

|    |                                                           |     |  |              |
|----|-----------------------------------------------------------|-----|--|--------------|
| 19 | may affect the authors' interpretation of the results?    |     |  | not reported |
| 20 | Was ethical approval or consent of participants attained? | Yes |  |              |

796

| <b>7. Demand for heterosexual commercial sex services in Ibadan, Nigeria</b> |                                                                                                                                                    |            |           |                                       |
|------------------------------------------------------------------------------|----------------------------------------------------------------------------------------------------------------------------------------------------|------------|-----------|---------------------------------------|
|                                                                              | <b>Question</b>                                                                                                                                    | <b>Yes</b> | <b>No</b> | <b>Don't know/ Comment</b>            |
| <b><i>Introduction</i></b>                                                   |                                                                                                                                                    |            |           |                                       |
| 1                                                                            | Were the aims/objectives of the study clear?                                                                                                       | Yes        |           |                                       |
| <b><i>Methods</i></b>                                                        |                                                                                                                                                    |            |           |                                       |
| 2                                                                            | Was the study design appropriate for the stated aim(s)?                                                                                            | Yes        |           | Time location sampling                |
| 3                                                                            | Was the sample size justified?                                                                                                                     |            | No        |                                       |
| 4                                                                            | Was the target/reference population clearly defined? (Is it clear who the research was about?)                                                     | Yes        |           |                                       |
| 5                                                                            | Was the sample frame taken from an appropriate population base so that it closely represented the target/reference population under investigation? | Yes        |           |                                       |
| 6                                                                            | Was the selection process likely to select subjects/participants that were representative of the target/reference population under investigation?  | Yes        |           |                                       |
| 7                                                                            | Were measures undertaken to address and categorise non-                                                                                            |            |           | I do not know since it's not reported |

|                   |                                                                                                                                                        |     |    |                                       |
|-------------------|--------------------------------------------------------------------------------------------------------------------------------------------------------|-----|----|---------------------------------------|
|                   | responders?                                                                                                                                            |     |    |                                       |
| 8                 | Were the risk factor and outcome variables measured appropriate to the aims of the study?                                                              | Yes |    |                                       |
| 9                 | Were the risk factor and outcome variables measured correctly using instruments/measurements that had been trialled, piloted, or published previously? |     |    | I do not know since it's not reported |
| 10                | Is it clear what was used to determine statistical significance and/or precision estimates? (e.g. p-values, confidence intervals)                      |     | No |                                       |
| 11                | Were the methods (including statistical methods) sufficiently described to enable them to be repeated?                                                 | Yes |    |                                       |
| <b>Results</b>    |                                                                                                                                                        |     |    |                                       |
| 12                | Were the basic data adequately described?                                                                                                              | Yes |    |                                       |
| 13                | Does the response rate raise concerns about non-response bias?                                                                                         |     | No |                                       |
| 14                | If appropriate, was information about non-responders described?                                                                                        |     | No |                                       |
| 15                | Were the results internally consistent?                                                                                                                | Yes |    |                                       |
| 16                | Were the results presented for all the analyses described in the methods?                                                                              | Yes |    |                                       |
| <b>Discussion</b> |                                                                                                                                                        |     |    |                                       |
| 17                | Were the authors' discussions and conclusions justified by the results?                                                                                | Yes |    |                                       |



|              |                                                                                                                     |  |    |                                       |
|--------------|---------------------------------------------------------------------------------------------------------------------|--|----|---------------------------------------|
| 18           | Were the limitations of the study discussed?                                                                        |  | No |                                       |
| <b>Other</b> |                                                                                                                     |  |    |                                       |
| 19           | Were there any funding sources or conflicts of interest that may affect the authors' interpretation of the results? |  |    | I do not know since it's not reported |
| 20           | Was ethical approval or consent of participants attained?                                                           |  |    | It is not specified                   |

797

|                                                                                                                                              |                                                                                                                                                    |            |           |                            |
|----------------------------------------------------------------------------------------------------------------------------------------------|----------------------------------------------------------------------------------------------------------------------------------------------------|------------|-----------|----------------------------|
| <b>8. A reasoned action model of male client involvement in commercial sex work in Kibera, a large informal settlement in Nairobi, Kenya</b> |                                                                                                                                                    |            |           |                            |
|                                                                                                                                              | <b>Question</b>                                                                                                                                    | <b>Yes</b> | <b>No</b> | <b>Don't know/ Comment</b> |
| <b>Introduction</b>                                                                                                                          |                                                                                                                                                    |            |           |                            |
| 1                                                                                                                                            | Were the aims/objectives of the study clear?                                                                                                       | Yes        |           |                            |
| <b>Methods</b>                                                                                                                               |                                                                                                                                                    |            |           |                            |
| 2                                                                                                                                            | Was the study design appropriate for the stated aim(s)?                                                                                            | Yes        |           | Time location sampling     |
| 3                                                                                                                                            | Was the sample size justified?                                                                                                                     |            | No        |                            |
| 4                                                                                                                                            | Was the target/reference population clearly defined? (Is it clear who the research was about?)                                                     | Yes        |           |                            |
| 5                                                                                                                                            | Was the sample frame taken from an appropriate population base so that it closely represented the target/reference population under investigation? | Yes        |           |                            |
|                                                                                                                                              | Was the selection process likely to select                                                                                                         | Yes        |           |                            |

|                |                                                                                                                                                        |     |    |                                       |
|----------------|--------------------------------------------------------------------------------------------------------------------------------------------------------|-----|----|---------------------------------------|
| 6              | subjects/participants that were representative of the target/reference population under investigation?                                                 |     |    |                                       |
| 7              | Were measures undertaken to address and categorise non-responders?                                                                                     |     |    | I do not know since it's not reported |
| 8              | Were the risk factor and outcome variables measured appropriate to the aims of the study?                                                              | Yes |    |                                       |
| 9              | Were the risk factor and outcome variables measured correctly using instruments/measurements that had been trialled, piloted, or published previously? |     |    | I do not know since it's not reported |
| 10             | Is it clear what was used to determine statistical significance and/or precision estimates? (e.g. p-values, confidence intervals)                      | Yes |    |                                       |
| 11             | Were the methods (including statistical methods) sufficiently described to enable them to be repeated?                                                 | Yes |    |                                       |
| <b>Results</b> |                                                                                                                                                        |     |    |                                       |
| 12             | Were the basic data adequately described?                                                                                                              | Yes |    |                                       |
| 13             | Does the response rate raise concerns about non-response bias?                                                                                         |     | No |                                       |
| 14             | If appropriate, was information about non-responders described?                                                                                        |     | No |                                       |
| 15             | Were the results internally consistent?                                                                                                                | Yes |    |                                       |
| 16             | Were the results presented for all the analyses described in the methods?                                                                              | Yes |    |                                       |

| <b>Discussion</b> |                                                                                                                     |     |    |  |
|-------------------|---------------------------------------------------------------------------------------------------------------------|-----|----|--|
| 17                | Were the authors' discussions and conclusions justified by the results?                                             | Yes |    |  |
| 18                | Were the limitations of the study discussed?                                                                        | Yes |    |  |
| <b>Other</b>      |                                                                                                                     |     |    |  |
| 19                | Were there any funding sources or conflicts of interest that may affect the authors' interpretation of the results? |     | No |  |
| 20                | Was ethical approval or consent of participants attained?                                                           | Yes |    |  |

798

799

| <b>9. HIV preventive behaviour and associated factors among mining workers in Sali traditional gold mining site bench maji zone, Southwest Ethiopia: a cross sectional study</b> |                                                             |            |           |                            |
|----------------------------------------------------------------------------------------------------------------------------------------------------------------------------------|-------------------------------------------------------------|------------|-----------|----------------------------|
|                                                                                                                                                                                  | <b>Question</b>                                             | <b>Yes</b> | <b>No</b> | <b>Don't know/ Comment</b> |
| <b>Introduction</b>                                                                                                                                                              |                                                             |            |           |                            |
| 1                                                                                                                                                                                | Were the aims/objectives of the study clear?                | Yes        |           |                            |
| <b>Methods</b>                                                                                                                                                                   |                                                             |            |           |                            |
| 2                                                                                                                                                                                | Was the study design appropriate for the stated aim(s)?     | Yes        |           |                            |
| 3                                                                                                                                                                                | Was the sample size justified?                              | Yes        |           |                            |
|                                                                                                                                                                                  | Was the target/reference population clearly defined? (Is it | Yes        |           |                            |

|                |                                                                                                                                                        |     |    |                                       |
|----------------|--------------------------------------------------------------------------------------------------------------------------------------------------------|-----|----|---------------------------------------|
| 4              | clear who the research was about?)                                                                                                                     |     |    |                                       |
| 5              | Was the sample frame taken from an appropriate population base so that it closely represented the target/reference population under investigation?     | Yes |    |                                       |
| 6              | Was the selection process likely to select subjects/participants that were representative of the target/reference population under investigation?      | Yes |    |                                       |
| 7              | Were measures undertaken to address and categorise non-responders?                                                                                     |     |    | I do not know since it's not reported |
| 8              | Were the risk factor and outcome variables measured appropriate to the aims of the study?                                                              | Yes |    |                                       |
| 9              | Were the risk factor and outcome variables measured correctly using instruments/measurements that had been trialled, piloted, or published previously? | Yes |    | Questionnaire pretested               |
| 10             | Is it clear what was used to determine statistical significance and/or precision estimates? (e.g. p-values, confidence intervals)                      | Yes |    |                                       |
| 11             | Were the methods (including statistical methods) sufficiently described to enable them to be repeated?                                                 | Yes |    |                                       |
| <b>Results</b> |                                                                                                                                                        |     |    |                                       |
| 12             | Were the basic data adequately described?                                                                                                              | Yes |    |                                       |
| 13             | Does the response rate raise concerns about non-response bias?                                                                                         |     | No |                                       |

|                   |                                                                                                                     |     |    |  |
|-------------------|---------------------------------------------------------------------------------------------------------------------|-----|----|--|
| 14                | If appropriate, was information about non-responders described?                                                     |     | No |  |
| 15                | Were the results internally consistent?                                                                             | Yes |    |  |
| 16                | Were the results presented for all the analyses described in the methods?                                           | Yes |    |  |
| <b>Discussion</b> |                                                                                                                     |     |    |  |
| 17                | Were the authors' discussions and conclusions justified by the results?                                             | Yes |    |  |
| 18                | Were the limitations of the study discussed?                                                                        | Yes |    |  |
| <b>Other</b>      |                                                                                                                     |     |    |  |
| 19                | Were there any funding sources or conflicts of interest that may affect the authors' interpretation of the results? | Yes |    |  |
| 20                | Was ethical approval or consent of participants attained?                                                           | Yes |    |  |

800

|                                                                                                                                                        |                                              |            |           |                            |
|--------------------------------------------------------------------------------------------------------------------------------------------------------|----------------------------------------------|------------|-----------|----------------------------|
| <b>10. Knowledge on HIV/AIDS and sexual behaviours among long-distance truck drivers at Kazungula weigh bridge terminal, Chobe district, Botswana.</b> |                                              |            |           |                            |
|                                                                                                                                                        | <b>Question</b>                              | <b>Yes</b> | <b>No</b> | <b>Don't know/ Comment</b> |
| <b>Introduction</b>                                                                                                                                    |                                              |            |           |                            |
| 1                                                                                                                                                      | Were the aims/objectives of the study clear? | Yes        |           |                            |
| <b>Methods</b>                                                                                                                                         |                                              |            |           |                            |

|                |                                                                                                                                                        |     |  |                                       |
|----------------|--------------------------------------------------------------------------------------------------------------------------------------------------------|-----|--|---------------------------------------|
| 2              | Was the study design appropriate for the stated aim(s)?                                                                                                | Yes |  |                                       |
| 3              | Was the sample size justified?                                                                                                                         | Yes |  |                                       |
| 4              | Was the target/reference population clearly defined? (Is it clear who the research was about?)                                                         | Yes |  |                                       |
| 5              | Was the sample frame taken from an appropriate population base so that it closely represented the target/reference population under investigation?     | Yes |  |                                       |
| 6              | Was the selection process likely to select subjects/participants that were representative of the target/reference population under investigation?      | Yes |  |                                       |
| 7              | Were measures undertaken to address and categorise non-responders?                                                                                     |     |  | I do not know since it's not reported |
| 8              | Were the risk factor and outcome variables measured appropriate to the aims of the study?                                                              | Yes |  |                                       |
| 9              | Were the risk factor and outcome variables measured correctly using instruments/measurements that had been trialled, piloted, or published previously? |     |  | I do not know since it's not reported |
| 10             | Is it clear what was used to determine statistical significance and/or precision estimates? (e.g. p-values, confidence intervals)                      | Yes |  |                                       |
| 11             | Were the methods (including statistical methods) sufficiently described to enable them to be repeated?                                                 | Yes |  |                                       |
| <b>Results</b> |                                                                                                                                                        |     |  |                                       |

|                   |                                                                                                                     |     |    |                                       |
|-------------------|---------------------------------------------------------------------------------------------------------------------|-----|----|---------------------------------------|
| 12                | Were the basic data adequately described?                                                                           | Yes |    |                                       |
| 13                | Does the response rate raise concerns about non-response bias?                                                      |     | No |                                       |
| 14                | If appropriate, was information about non-responders described?                                                     |     | No |                                       |
| 15                | Were the results internally consistent?                                                                             | Yes |    |                                       |
| 16                | Were the results presented for all the analyses described in the methods?                                           | Yes |    |                                       |
| <b>Discussion</b> |                                                                                                                     |     |    |                                       |
| 17                | Were the authors' discussions and conclusions justified by the results?                                             | Yes |    |                                       |
| 18                | Were the limitations of the study discussed?                                                                        |     | No |                                       |
| <b>Other</b>      |                                                                                                                     |     |    |                                       |
| 19                | Were there any funding sources or conflicts of interest that may affect the authors' interpretation of the results? |     |    | I do not know since it's not reported |
| 20                | Was ethical approval or consent of participants attained?                                                           | Yes |    |                                       |

801

|                                                                                                                                            |                 |            |           |                                |
|--------------------------------------------------------------------------------------------------------------------------------------------|-----------------|------------|-----------|--------------------------------|
| <b>11. Sexual practices, risk perception, and HIV self-testing acceptability among long-distance truck drivers in Ekiti State, Nigeria</b> |                 |            |           |                                |
|                                                                                                                                            | <b>Question</b> | <b>Yes</b> | <b>No</b> | <b>Don't know/<br/>Comment</b> |

| <b><i>Introduction</i></b> |                                                                                                                                                        |     |                                       |
|----------------------------|--------------------------------------------------------------------------------------------------------------------------------------------------------|-----|---------------------------------------|
| 1                          | Were the aims/objectives of the study clear?                                                                                                           | Yes |                                       |
| <b><i>Methods</i></b>      |                                                                                                                                                        |     |                                       |
| 2                          | Was the study design appropriate for the stated aim(s)?                                                                                                | Yes |                                       |
| 3                          | Was the sample size justified?                                                                                                                         | Yes |                                       |
| 4                          | Was the target/reference population clearly defined? (Is it clear who the research was about?)                                                         | Yes |                                       |
| 5                          | Was the sample frame taken from an appropriate population base so that it closely represented the target/reference population under investigation?     | Yes |                                       |
| 6                          | Was the selection process likely to select subjects/participants that were representative of the target/reference population under investigation?      | Yes |                                       |
| 7                          | Were measures undertaken to address and categorise non-responders?                                                                                     |     | I do not know since it's not reported |
| 8                          | Were the risk factor and outcome variables measured appropriate to the aims of the study?                                                              | Yes |                                       |
| 9                          | Were the risk factor and outcome variables measured correctly using instruments/measurements that had been trialled, piloted, or published previously? |     | I do not know since it's not reported |
| 10                         | Is it clear what was used to determine statistical significance and/or precision estimates? (e.g. p-values, confidence intervals)                      | Yes |                                       |



|                   |                                                                                                                     |     |    |                                                                      |
|-------------------|---------------------------------------------------------------------------------------------------------------------|-----|----|----------------------------------------------------------------------|
| 11                | Were the methods (including statistical methods) sufficiently described to enable them to be repeated?              |     | No | The analysis section is shallow, it does not contain a lot of detail |
| <b>Results</b>    |                                                                                                                     |     |    |                                                                      |
| 12                | Were the basic data adequately described?                                                                           | Yes |    |                                                                      |
| 13                | Does the response rate raise concerns about non-response bias?                                                      |     | No |                                                                      |
| 14                | If appropriate, was information about non-responders described?                                                     |     | No |                                                                      |
| 15                | Were the results internally consistent?                                                                             | Yes |    |                                                                      |
| 16                | Were the results presented for all the analyses described in the methods?                                           | Yes |    |                                                                      |
| <b>Discussion</b> |                                                                                                                     |     |    |                                                                      |
| 17                | Were the authors' discussions and conclusions justified by the results?                                             | Yes |    |                                                                      |
| 18                | Were the limitations of the study discussed?                                                                        | Yes |    |                                                                      |
| <b>Other</b>      |                                                                                                                     |     |    |                                                                      |
| 19                | Were there any funding sources or conflicts of interest that may affect the authors' interpretation of the results? |     | No | The authors declared no conflicts of interest                        |
| 20                | Was ethical approval or consent of participants attained?                                                           | Yes |    |                                                                      |

802

**12. HIV prevalence and risk in long-distance truck drivers in South Africa: A national cross-sectional surveys**

|                            | <b>Question</b>                                                                                                                                    | <b>Yes</b> | <b>No</b> | <b>Don't know/<br/>Comment</b>        |
|----------------------------|----------------------------------------------------------------------------------------------------------------------------------------------------|------------|-----------|---------------------------------------|
| <b><i>Introduction</i></b> |                                                                                                                                                    |            |           |                                       |
| 1                          | Were the aims/objectives of the study clear?                                                                                                       | Yes        |           |                                       |
| <b><i>Methods</i></b>      |                                                                                                                                                    |            |           |                                       |
| 2                          | Was the study design appropriate for the stated aim(s)?                                                                                            | Yes        |           |                                       |
| 3                          | Was the sample size justified?                                                                                                                     | Yes        |           |                                       |
| 4                          | Was the target/reference population clearly defined? (Is it clear who the research was about?)                                                     | Yes        |           |                                       |
| 5                          | Was the sample frame taken from an appropriate population base so that it closely represented the target/reference population under investigation? | Yes        |           |                                       |
| 6                          | Was the selection process likely to select subjects/participants that were representative of the target/reference population under investigation?  | Yes        |           |                                       |
| 7                          | Were measures undertaken to address and categorise non-responders?                                                                                 |            |           | I do not know since it's not reported |
| 8                          | Were the risk factor and outcome variables measured appropriate to the aims of the study?                                                          | Yes        |           |                                       |
| 9                          | Were the risk factor and outcome variables measured correctly using instruments/measurements that had been                                         |            |           | I do not know since it's not reported |

|                   |                                                                                                                                   |     |    |                                                                      |
|-------------------|-----------------------------------------------------------------------------------------------------------------------------------|-----|----|----------------------------------------------------------------------|
|                   | trialled, piloted, or published previously?                                                                                       |     |    |                                                                      |
| 10                | Is it clear what was used to determine statistical significance and/or precision estimates? (e.g. p-values, confidence intervals) | Yes |    |                                                                      |
| 11                | Were the methods (including statistical methods) sufficiently described to enable them to be repeated?                            |     | No | The analysis section is shallow, it does not contain a lot of detail |
| <b>Results</b>    |                                                                                                                                   |     |    |                                                                      |
| 12                | Were the basic data adequately described?                                                                                         | Yes |    |                                                                      |
| 13                | Does the response rate raise concerns about non-response bias?                                                                    |     | No |                                                                      |
| 14                | If appropriate, was information about non-responders described?                                                                   |     | No |                                                                      |
| 15                | Were the results internally consistent?                                                                                           | Yes |    |                                                                      |
| 16                | Were the results presented for all the analyses described in the methods?                                                         | Yes |    |                                                                      |
| <b>Discussion</b> |                                                                                                                                   |     |    |                                                                      |
| 17                | Were the authors' discussions and conclusions justified by the results?                                                           | Yes |    |                                                                      |
| 18                | Were the limitations of the study discussed?                                                                                      | Yes |    |                                                                      |
| <b>Other</b>      |                                                                                                                                   |     |    |                                                                      |
| 19                | Were there any funding sources or conflicts of interest that may affect the authors' interpretation of the results?               |     | No | The authors declared no conflicts of interest                        |

|    |                                                           |     |  |  |
|----|-----------------------------------------------------------|-----|--|--|
| 20 | Was ethical approval or consent of participants attained? | Yes |  |  |
|----|-----------------------------------------------------------|-----|--|--|

803

804

| <b>13. Cross-sectional study of the health of southern African truck drivers</b> |                                                                                                                                                    |            |           |                                                               |
|----------------------------------------------------------------------------------|----------------------------------------------------------------------------------------------------------------------------------------------------|------------|-----------|---------------------------------------------------------------|
|                                                                                  | <b>Question</b>                                                                                                                                    | <b>Yes</b> | <b>No</b> | <b>Don't know/ Comment</b>                                    |
| <b><i>Introduction</i></b>                                                       |                                                                                                                                                    |            |           |                                                               |
| 1                                                                                | Were the aims/objectives of the study clear?                                                                                                       | Yes        |           |                                                               |
| <b><i>Methods</i></b>                                                            |                                                                                                                                                    |            |           |                                                               |
| 2                                                                                | Was the study design appropriate for the stated aim(s)?                                                                                            | Yes        |           |                                                               |
| 3                                                                                | Was the sample size justified?                                                                                                                     |            | No        | The study did not mention how they calculated the sample size |
| 4                                                                                | Was the target/reference population clearly defined? (Is it clear who the research was about?)                                                     | Yes        |           |                                                               |
| 5                                                                                | Was the sample frame taken from an appropriate population base so that it closely represented the target/reference population under investigation? | Yes        |           |                                                               |
| 6                                                                                | Was the selection process likely to select subjects/participants that were representative of the                                                   | Yes        |           |                                                               |

|                   |                                                                                                                                                        |     |    |                                       |
|-------------------|--------------------------------------------------------------------------------------------------------------------------------------------------------|-----|----|---------------------------------------|
|                   | target/reference population under investigation?                                                                                                       |     |    |                                       |
| 7                 | Were measures undertaken to address and categorise non-responders?                                                                                     |     |    | I do not know since it's not reported |
| 8                 | Were the risk factor and outcome variables measured appropriate to the aims of the study?                                                              | Yes |    |                                       |
| 9                 | Were the risk factor and outcome variables measured correctly using instruments/measurements that had been trialled, piloted, or published previously? |     |    | I do not know since it's not reported |
| 10                | Is it clear what was used to determine statistical significance and/or precision estimates? (e.g. p-values, confidence intervals)                      |     | No | No statistical tests were conducted   |
| 11                | Were the methods (including statistical methods) sufficiently described to enable them to be repeated?                                                 | Yes |    |                                       |
| <b>Results</b>    |                                                                                                                                                        |     |    |                                       |
| 12                | Were the basic data adequately described?                                                                                                              | Yes |    |                                       |
| 13                | Does the response rate raise concerns about non-response bias?                                                                                         | Yes |    | Difficulty recruiting truckers        |
| 14                | If appropriate, was information about non-responders described?                                                                                        |     | No |                                       |
| 15                | Were the results internally consistent?                                                                                                                | Yes |    |                                       |
| 16                | Were the results presented for all the analyses described in the methods?                                                                              | Yes |    |                                       |
| <b>Discussion</b> |                                                                                                                                                        |     |    |                                       |

|              |                                                                                                                     |     |    |                                               |
|--------------|---------------------------------------------------------------------------------------------------------------------|-----|----|-----------------------------------------------|
| 17           | Were the authors' discussions and conclusions justified by the results?                                             | Yes |    |                                               |
| 18           | Were the limitations of the study discussed?                                                                        | Yes |    |                                               |
| <b>Other</b> |                                                                                                                     |     |    |                                               |
| 19           | Were there any funding sources or conflicts of interest that may affect the authors' interpretation of the results? |     | No | The authors declared no conflicts of interest |
| 20           | Was ethical approval or consent of participants attained?                                                           | Yes |    |                                               |

805

|                                                                                                |                                                             |            |           |                                                               |
|------------------------------------------------------------------------------------------------|-------------------------------------------------------------|------------|-----------|---------------------------------------------------------------|
| <b>14. HIV prevalence and risk behaviours among Mozambicans working in South African mines</b> |                                                             |            |           |                                                               |
|                                                                                                | <b>Question</b>                                             | <b>Yes</b> | <b>No</b> | <b>Don't know/ Comment</b>                                    |
| <b>Introduction</b>                                                                            |                                                             |            |           |                                                               |
| 1                                                                                              | Were the aims/objectives of the study clear?                | Yes        |           |                                                               |
| <b>Methods</b>                                                                                 |                                                             |            |           |                                                               |
| 2                                                                                              | Was the study design appropriate for the stated aim(s)?     | Yes        |           | Time-location sampling                                        |
| 3                                                                                              | Was the sample size justified?                              |            | No        | The study did not mention how they calculated the sample size |
|                                                                                                | Was the target/reference population clearly defined? (Is it | Yes        |           |                                                               |

|                |                                                                                                                                                        |     |    |                                       |
|----------------|--------------------------------------------------------------------------------------------------------------------------------------------------------|-----|----|---------------------------------------|
| 4              | clear who the research was about?)                                                                                                                     |     |    |                                       |
| 5              | Was the sample frame taken from an appropriate population base so that it closely represented the target/reference population under investigation?     | Yes |    |                                       |
| 6              | Was the selection process likely to select subjects/participants that were representative of the target/reference population under investigation?      | Yes |    |                                       |
| 7              | Were measures undertaken to address and categorise non-responders?                                                                                     |     |    | I do not know since it's not reported |
| 8              | Were the risk factor and outcome variables measured appropriate to the aims of the study?                                                              | Yes |    |                                       |
| 9              | Were the risk factor and outcome variables measured correctly using instruments/measurements that had been trialled, piloted, or published previously? |     |    | I do not know since it's not reported |
| 10             | Is it clear what was used to determine statistical significance and/or precision estimates? (e.g. p-values, confidence intervals)                      |     | No | No statistical tests were conducted   |
| 11             | Were the methods (including statistical methods) sufficiently described to enable them to be repeated?                                                 | Yes |    |                                       |
| <b>Results</b> |                                                                                                                                                        |     |    |                                       |
| 12             | Were the basic data adequately described?                                                                                                              | Yes |    |                                       |
| 13             | Does the response rate raise concerns about non-response bias?                                                                                         |     | No |                                       |

|                          |                                                                                                                     |     |    |  |
|--------------------------|---------------------------------------------------------------------------------------------------------------------|-----|----|--|
| 14                       | If appropriate, was information about non-responders described?                                                     |     | No |  |
| 15                       | Were the results internally consistent?                                                                             | Yes |    |  |
| 16                       | Were the results presented for all the analyses described in the methods?                                           | Yes |    |  |
| <b><i>Discussion</i></b> |                                                                                                                     |     |    |  |
| 17                       | Were the authors' discussions and conclusions justified by the results?                                             | Yes |    |  |
| 18                       | Were the limitations of the study discussed?                                                                        | Yes |    |  |
| <b><i>Other</i></b>      |                                                                                                                     |     |    |  |
| 19                       | Were there any funding sources or conflicts of interest that may affect the authors' interpretation of the results? |     | No |  |
| 20                       | Was ethical approval or consent of participants attained?                                                           | Yes |    |  |

806

|                                                                                                                                                                              |                                              |            |           |                            |
|------------------------------------------------------------------------------------------------------------------------------------------------------------------------------|----------------------------------------------|------------|-----------|----------------------------|
| <b>15. population sizes, HIV prevalence, and HIV prevention among men who paid for sex in sub-Saharan Africa (2000-2020): A meta-analysis of 87 population-based surveys</b> |                                              |            |           |                            |
|                                                                                                                                                                              | <b>Question</b>                              | <b>Yes</b> | <b>No</b> | <b>Don't know/ Comment</b> |
| <b><i>Introduction</i></b>                                                                                                                                                   |                                              |            |           |                            |
| 1                                                                                                                                                                            | Were the aims/objectives of the study clear? | Yes        |           |                            |



| <b>Methods</b> |                                                                                                                                                        |     |                                       |
|----------------|--------------------------------------------------------------------------------------------------------------------------------------------------------|-----|---------------------------------------|
| 2              | Was the study design appropriate for the stated aim(s)?                                                                                                | Yes | Meta-analysis                         |
| 3              | Was the sample size justified?                                                                                                                         | Yes |                                       |
| 4              | Was the target/reference population clearly defined? (Is it clear who the research was about?)                                                         | Yes |                                       |
| 5              | Was the sample frame taken from an appropriate population base so that it closely represented the target/reference population under investigation?     | Yes |                                       |
| 6              | Was the selection process likely to select subjects/participants that were representative of the target/reference population under investigation?      | Yes |                                       |
| 7              | Were measures undertaken to address and categorise non-responders?                                                                                     |     | I do not know since it's not reported |
| 8              | Were the risk factor and outcome variables measured appropriate to the aims of the study?                                                              | Yes |                                       |
| 9              | Were the risk factor and outcome variables measured correctly using instruments/measurements that had been trialled, piloted, or published previously? | Yes |                                       |
| 10             | Is it clear what was used to determine statistical significance and/or precision estimates? (e.g. p-values, confidence intervals)                      | Yes |                                       |
| 11             | Were the methods (including statistical methods) sufficiently described to enable them to be repeated?                                                 | Yes |                                       |

| <b>Results</b>    |                                                                                                                     |     |    |  |
|-------------------|---------------------------------------------------------------------------------------------------------------------|-----|----|--|
| 12                | Were the basic data adequately described?                                                                           | Yes |    |  |
| 13                | Does the response rate raise concerns about non-response bias?                                                      |     | No |  |
| 14                | If appropriate, was information about non-responders described?                                                     |     | No |  |
| 15                | Were the results internally consistent?                                                                             | Yes |    |  |
| 16                | Were the results presented for all the analyses described in the methods?                                           | Yes |    |  |
| <b>Discussion</b> |                                                                                                                     |     |    |  |
| 17                | Were the authors' discussions and conclusions justified by the results?                                             | Yes |    |  |
| 18                | Were the limitations of the study discussed?                                                                        | Yes |    |  |
| <b>Other</b>      |                                                                                                                     |     |    |  |
| 19                | Were there any funding sources or conflicts of interest that may affect the authors' interpretation of the results? |     | No |  |
| 20                | Was ethical approval or consent of participants attained?                                                           | Yes |    |  |

## 808 S2 APPENDIX: EXCLUDED STUDIES AND REASONS FOR EXCLUSION

|    | <b>Author</b>                                                                                                                                                     | <b>Reasons</b>                   | <b>Summary or description of the content</b>                                                                                                                                      |
|----|-------------------------------------------------------------------------------------------------------------------------------------------------------------------|----------------------------------|-----------------------------------------------------------------------------------------------------------------------------------------------------------------------------------|
| 1. | Assessing the Potential Impact of Disruptions Due to COVID-19 on HIV Among Key and Lower-Risk Populations in the Largest Cities of Cameroon and Benin             | No data on having sex with a FSW | <ul style="list-style-type: none"> <li>The study did not investigate whether the men had sex with FSW or not.</li> </ul>                                                          |
| 2. | Differences in risky sexual behaviors and HIV prevalence of circumcised and uncircumcised men in Uganda: evidence from a 2011 cross-sectional national survey(66) | No data on having sex with a FSW | <ul style="list-style-type: none"> <li>The study investigated sexual risk behaviours including transactional sex</li> </ul>                                                       |
| 3. | Hazardous alcohol consumption and alcohol-related problems are associated with unknown and HIV-positive status in fishing communities in Uganda(67)               | No data on having sex with a FSW | <ul style="list-style-type: none"> <li>The study was assessed among different populations but did not investigate having sex with FSW among men recruited in the study</li> </ul> |

|    |                                                                                                                                                                             |                                  |                                                                                                                                                                                                                          |
|----|-----------------------------------------------------------------------------------------------------------------------------------------------------------------------------|----------------------------------|--------------------------------------------------------------------------------------------------------------------------------------------------------------------------------------------------------------------------|
| 4. | HIV risk perception and behavior among medically and traditionally circumcised males in South Africa(68)                                                                    | No data on having sex with a FSW | <ul style="list-style-type: none"> <li>The study did not investigate whether the men had sex with FSW or not so it did not meet the inclusion criteria</li> </ul>                                                        |
| 5. | Voluntary medical male circumcision and sexual practices among sexually active circumcised men in Mzuzu, Malawi: a cross-sectional study                                    | No data on having sex with a FSW | <ul style="list-style-type: none"> <li>The study investigated transactional sex which is different from paying FSW for sex</li> </ul>                                                                                    |
| 6. | An assessment of sexual risk behaviours among circumcised and uncircumcised men before and after the implementation of the safe male circumcision programme in Botswana(69) | No data on having sex with a FSW | <ul style="list-style-type: none"> <li>The study did not investigate having sex with FSW or not among the men recruited</li> </ul>                                                                                       |
| 7. | Consistent condom use among men with non-marital partners in four sub-Saharan African countries(70)                                                                         | No data on having sex with a FSW | <ul style="list-style-type: none"> <li>The study assessed the influence of marital status on condom use among men with casual partners. The article did not report about the men engaging female sex workers.</li> </ul> |
| 8. | The contribution of emotional partners to sexual                                                                                                                            | Ineligible population            | <ul style="list-style-type: none"> <li>The study was conducted among FSW</li> </ul>                                                                                                                                      |

|     |                                                                                                                                                                        |                                  |                                                                                                                                                                          |
|-----|------------------------------------------------------------------------------------------------------------------------------------------------------------------------|----------------------------------|--------------------------------------------------------------------------------------------------------------------------------------------------------------------------|
|     | risk taking and violence among female sex workers in Mombasa, Kenya: a cohort study(71)                                                                                |                                  |                                                                                                                                                                          |
| 9.  | HIV prevalence and risk behavior among male and female adults screened for enrolment into a vaccine preparedness study in Maputo, Mozambique(72)                       | Ineligible population            | <ul style="list-style-type: none"> <li>The study was conducted among men and women in the general community and did not report about men having sex with FSW.</li> </ul> |
| 10. | Mobility is Associated with Higher-risk Sexual Partnerships Among Both Men and Women in Co-resident Couples in Rural Kenya and Uganda: A Longitudinal Cohort Study(73) | No data on having sex with a FSW | <ul style="list-style-type: none"> <li>The study did not investigate having sex with female sex workers</li> </ul>                                                       |
| 11. | Populations at increased risk for HIV infection in Kenya: results from a national population-based household survey, 2012(74)                                          | No data on having sex with a FSW | <ul style="list-style-type: none"> <li>The article reported about transactional sex with FSW which is different from sex work</li> </ul>                                 |
| 12. | Sexual risk behaviors following circumcision among HIV-positive men in Rakai, Uganda(75)                                                                               | No data on having sex with a FSW | <ul style="list-style-type: none"> <li>The study assessed sexual risk behaviours among HIV-positive men and did not include sex work engagement in this</li> </ul>       |

|     |                                                                                                                                                                                                                                                                        |                                  |                                                                                                                                                                                                                             |
|-----|------------------------------------------------------------------------------------------------------------------------------------------------------------------------------------------------------------------------------------------------------------------------|----------------------------------|-----------------------------------------------------------------------------------------------------------------------------------------------------------------------------------------------------------------------------|
|     |                                                                                                                                                                                                                                                                        |                                  | population                                                                                                                                                                                                                  |
| 13. | Work-related violence and inconsistent condom use with non-paying partners among female sex workers in Adama City, Ethiopia(76)                                                                                                                                        | Ineligible population            | <ul style="list-style-type: none"> <li>The study was conducted among female sex workers</li> </ul>                                                                                                                          |
| 14. | Effects of a Short Message Service (SMS) Intervention on Reduction of HIV Risk Behaviours and Improving HIV Testing Rates Among Populations located near Roadside Wellness Clinics: A Cluster Randomised Controlled Trial in South Africa, Zimbabwe and Mozambique(77) | No data on having sex with a FSW | <ul style="list-style-type: none"> <li>The study was conducted among truck drivers, sex workers, and community residents but did not report on any engagements between female sex workers and other populations.</li> </ul> |
| 15. | Alcohol Misuse and Illicit Drug Use Among Occupational Groups at High Risk of HIV in Sub-Saharan Africa: A Systematic Review(78)                                                                                                                                       | Ineligible study design          | <ul style="list-style-type: none"> <li>The article was a systematic review</li> </ul>                                                                                                                                       |
| 16. | A comparison of sexual risk behaviours and HIV seroprevalence among circumcised and                                                                                                                                                                                    | No data on having sex with a FSW | <ul style="list-style-type: none"> <li>The study did not report on whether the men had sex with female sex workers or</li> </ul>                                                                                            |

|     |                                                                                                                                   |                         |                                                                                                                                                                                                                |
|-----|-----------------------------------------------------------------------------------------------------------------------------------|-------------------------|----------------------------------------------------------------------------------------------------------------------------------------------------------------------------------------------------------------|
|     | uncircumcised men before and after implementation of the safe male circumcision programme in Uganda(79)                           |                         | not.                                                                                                                                                                                                           |
| 17. | Consistent condom use among men who pay for sex in sub-Saharan Africa: Empirical evidence from Demographic and Health Surveys(80) | Ineligible study design | <ul style="list-style-type: none"> <li>The study used Demographic and Health Surveys that were also used in a meta-analysis conducted by Hodgins(81).</li> </ul>                                               |
| 18. | Factors Associated with Variations in Population HIV Prevalence across West Africa: Findings from an Ecological Analysis(82)      | Ineligible study design | <ul style="list-style-type: none"> <li>The study used data from Demographic and Health Surveys that were also used in the meta-analysis conducted by Hodgins(81) among 87 population based surveys.</li> </ul> |
| 19. | Finding hidden HIV clusters to support geographic-oriented HIV interventions in Kenya(83)                                         | Ineligible study design | <ul style="list-style-type: none"> <li>This was a population-based study (KAIS) which was also reported in the meta-analysis by Hodgins(29)</li> </ul>                                                         |
| 20. | Gender role conflict and sexual health and relationship practices amongst young men living in                                     | Ineligible population   | <ul style="list-style-type: none"> <li>The study was conducted among men and women in the general population</li> </ul>                                                                                        |

|     |                                                                                                                                                                    |                                  |                                                                                                                                                                          |
|-----|--------------------------------------------------------------------------------------------------------------------------------------------------------------------|----------------------------------|--------------------------------------------------------------------------------------------------------------------------------------------------------------------------|
|     | urban informal settlements in South Africa(84)                                                                                                                     |                                  |                                                                                                                                                                          |
| 21. | HIV epidemiology among female sex workers and their clients in the Middle East and North Africa: systematic review, meta-analyses, and meta-regressions(85)        | Ineligible study design          | <ul style="list-style-type: none"> <li>The study was a systematic review and thus not primary research.</li> </ul>                                                       |
| 22. | Khat chewing and risky sexual behavior in Sub-Saharan Africa: a systematic review protocol(86)                                                                     | Ineligible study design          | <ul style="list-style-type: none"> <li>The study was a systematic review protocol and thus not primary research.</li> </ul>                                              |
| 23. | Social venues and HIV vulnerability of young venue workers: a cluster analysis of data from a national-level cross-sectional survey of social venues in Uganda(87) | Ineligible study design          | <ul style="list-style-type: none"> <li>This was a secondary analysis of data from a larger cross-sectional survey of social venues in 25 districts of Uganda.</li> </ul> |
| 24. | Socioeconomic factors impact the risk of HIV acquisition in the township population of South Africa: A Bayesian analysis(88)                                       | Ineligible study design          | <ul style="list-style-type: none"> <li>In this study, the authors conducted a secondary data analysis</li> </ul>                                                         |
| 25. | Traditional Male Circumcision is Associated with Sexual Risk Behaviors in Sub-Saharan Countries                                                                    | No data on having sex with a FSW | <ul style="list-style-type: none"> <li>The study assessed the association between three sexual risk behaviors condom use</li> </ul>                                      |



|     |                                                                                                                                                    |                                                          |                                                                                                                                                                                                              |
|-----|----------------------------------------------------------------------------------------------------------------------------------------------------|----------------------------------------------------------|--------------------------------------------------------------------------------------------------------------------------------------------------------------------------------------------------------------|
|     | Prioritized for Male Circumcision(89)                                                                                                              |                                                          | with non-cohabiting partners, number of non-cohabiting partners, and partner type—and circumcision status but did not report about engaging FSW services among these men                                     |
| 26. | Costing analysis of an SMS-based intervention to promote HIV self-testing amongst truckers and sex workers in Kenya(90)                            | No data on having sex with a FSW                         | <ul style="list-style-type: none"> <li>The study estimated the costs of an intervention to promote HIV testing among truck drivers and did not report on their engagement with female sex workers</li> </ul> |
| 27. | Epidemiology of HIV among female sex workers, their clients, men who have sex with men, and people who inject drugs in West and Central Africa(91) | Ineligible study design                                  | <ul style="list-style-type: none"> <li>The article is a systematic review of HIV literature among key populations in WCA conducted since the onset of the HIV epidemic.</li> </ul>                           |
| 28. | Evaluating the prevalence and patterns of sexual risk behavior among undergraduate university students in Ethiopia: implication for psychosocial   | Results different from what the study design talks about | <ul style="list-style-type: none"> <li>There is a difference between what the study seeks to achieve and the findings of the study</li> </ul>                                                                |

|     |                                                                                                                                                            |                                  |                                                                                                                                                                       |
|-----|------------------------------------------------------------------------------------------------------------------------------------------------------------|----------------------------------|-----------------------------------------------------------------------------------------------------------------------------------------------------------------------|
|     | intervention(92)                                                                                                                                           |                                  |                                                                                                                                                                       |
| 29. | HIV and Syphilis Prevalence and Associated Risks in the Cameroonian Armed Forces(93)                                                                       | No access to full-text           | <ul style="list-style-type: none"> <li>There is no access to full-text for this study</li> </ul>                                                                      |
| 30. | HIV Testing Approaches to Optimize Prevention and Treatment for Key and Priority Populations in Malawi(94)                                                 | Ineligible study design          | <ul style="list-style-type: none"> <li>The data used for analysis was extracted from program data routinely collected for the LINKAGES project</li> </ul>             |
| 31. | HIV-related stigma and its association with HIV transmission risk behaviors among boda boda motorcyclists in Mbarara municipality, southwestern Uganda(95) | No access to full text           | <ul style="list-style-type: none"> <li>There was no access to full-text for the article.</li> </ul>                                                                   |
| 32. | HIV/AIDS risk perception and behavior of college students of the Metekel Zone, Benishangul Gumuz regional state, Ethiopia(96)                              | No access to full-text           | <ul style="list-style-type: none"> <li>There was no access to full-text for the article.</li> </ul>                                                                   |
| 33. | Predictors for HIV testing among Chinese workers in infrastructure construction enterprises in Kenya(97)                                                   | No data on having sex with a FSW | <ul style="list-style-type: none"> <li>The study did not investigate whether the men recruited in the study had sex with FSW or not which was an important</li> </ul> |

|     |                                                                                                                     |                                  | inclusion criteria                                                                                                                                                                                                                                    |
|-----|---------------------------------------------------------------------------------------------------------------------|----------------------------------|-------------------------------------------------------------------------------------------------------------------------------------------------------------------------------------------------------------------------------------------------------|
| 34. | Predictors of HIV Among 1 Million Clients in High-Risk Male Populations in Tanzania(98)                             | Ineligible study design          | <ul style="list-style-type: none"> <li>This article used secondary data from a cross-sectional study nested within a large-scale community-based HIV prevention program</li> </ul>                                                                    |
| 35. | Role Of Emigration In The Spread Of HIV Infection In The Region Of Kayes, Mali(99)                                  | Inapplicable language- French    | <ul style="list-style-type: none"> <li>The article was written in French and I could not translate it.</li> </ul>                                                                                                                                     |
| 36. | Socio-demographic contributors to health and safety of mine workers in South Africa(100)                            | No data on having sex with a FSW | <ul style="list-style-type: none"> <li>The study assessed the relationship between socio-demographic factors and health, safety, and wellness among mine workers. There was no investigation of having sex with female sex workers or not.</li> </ul> |
| 37. | Transactional sex and HIV risks - evidence from a cross-sectional national survey among young people in Uganda(101) | No data on having sex with a FSW | <ul style="list-style-type: none"> <li>The study assessed transactional sex which is different from paying FSW for sex</li> </ul>                                                                                                                     |
| 38. | Uptake and retention on HIV pre-exposure                                                                            | Ineligible study                 | <ul style="list-style-type: none"> <li>The study used secondary data from</li> </ul>                                                                                                                                                                  |

|     |                                                                                                                                               |                                  |                                                                                                                                                                                                              |
|-----|-----------------------------------------------------------------------------------------------------------------------------------------------|----------------------------------|--------------------------------------------------------------------------------------------------------------------------------------------------------------------------------------------------------------|
|     | prophylaxis among key and priority populations in South-Central Uganda(102)                                                                   | design                           | registers of the PrEP programme.                                                                                                                                                                             |
| 39. | What's in a name? A mixed method study on how young women who sell sex characterize male partners and their use of condoms(103)               | Inapplicable population          | <ul style="list-style-type: none"> <li>The study was conducted among female sex workers to characterize male partners and their use of condoms. The study did not investigate sex work among men.</li> </ul> |
| 40. | Willingness to use short-term oral pre-exposure prophylaxis (PrEP) by migrant miners and female partners of migrant miners in Mozambique(104) | No access to full-text           | <ul style="list-style-type: none"> <li>There is no access to the full text of the article</li> <li>The article does not report on paying sex worker for sex</li> </ul>                                       |
| 41. | Alcohol use and its association with sexual risk behaviors in the Armed Forces of the Republic of the Congo(32)                               | Ineligible study design          | <ul style="list-style-type: none"> <li>A secondary analysis of data collected from a 2014 seroprevalence and behavioral epidemiology risk survey was performed</li> </ul>                                    |
| 42. | Knowledge, attitudes & barriers to condom use among female sex workers and truck drivers in Uganda: a mixed-methods study(105)                | No data on having sex with a FSW | <ul style="list-style-type: none"> <li>The study did not investigate whether there was FSW engagement</li> <li>The study also employed mixed methods</li> </ul>                                              |

|     |                                                                                                                                                         |                                  |                                                                                                                                                                                                               |
|-----|---------------------------------------------------------------------------------------------------------------------------------------------------------|----------------------------------|---------------------------------------------------------------------------------------------------------------------------------------------------------------------------------------------------------------|
|     |                                                                                                                                                         |                                  | approach                                                                                                                                                                                                      |
| 43. | HIV/AIDS prevention practices among military personnel in Northwest Ethiopia(106)                                                                       | No data on having sex with a FSW | <ul style="list-style-type: none"> <li>The study did not investigate whether the military personnel had sex with FSW or not</li> </ul>                                                                        |
| 44. | The association between client type and condom use with steady and unsteady partners among persons seeking HIV testing and counseling services in Kenya | No data on having sex with a FSW | <ul style="list-style-type: none"> <li>The study did not investigate FSW engagement among the population surveyed</li> <li>Assessments were made on the general population, truck drivers, and FSW</li> </ul> |
| 45. | Consistent Condom Use during Casual Sex among Long-Truck Drivers in Togo(107)                                                                           | No data on having sex with a FSW | <ul style="list-style-type: none"> <li>The study assessed factors associated with casual sex among LDTD which is different from sex with FSW</li> </ul>                                                       |
| 46. | Comportment of heavy goods vehicle drivers in HIV spread along settlements around Kaduna: Kano road transport corridor in Nigeria(108)                  | No data on having sex with a FSW | <ul style="list-style-type: none"> <li>The study did not investigate about having sex with FSW which is an important inclusion criteria</li> </ul>                                                            |
| 47. | Left behind?: male clients of female sex workers in Zambia                                                                                              | Ineligible study design          | <ul style="list-style-type: none"> <li>This was a Demographic and Health Survey (DHS) which was also part of the meta-analysis.</li> </ul>                                                                    |

|     |                                                                                                                                                                                |                                   |                                                                                                                                                                                         |
|-----|--------------------------------------------------------------------------------------------------------------------------------------------------------------------------------|-----------------------------------|-----------------------------------------------------------------------------------------------------------------------------------------------------------------------------------------|
| 48. | Factors associated with buying sex and the knowledge that condoms prevent HIV among longdistance truck drivers at Kazungula weighbridge terminal, Chobe District, Botswana(33) | Duplicate article                 | <ul style="list-style-type: none"> <li>• The paper reports the same results as reported in another article but with a different title.</li> </ul>                                       |
| 49. | Condom Use Behaviors and Correlates of Use in the Botswana Defence Force(109)                                                                                                  | No data on having sex with an FSW | <ul style="list-style-type: none"> <li>• The inclusion criteria for this scoping review specifically require the presence of having sex with FSW among the subgroups of men.</li> </ul> |



## Identification of studies via databases

Identification

Records identified from databases n=2067  
Global health (n=635)  
MEDLINE Complete (n=797)  
CINAHL (n=635)

Records removed *before screening*:  
Duplicate records removed (n=410)

Screening

Records screened by title and abstract (n=1657)

Records excluded\*\* (n=1593)

Articles sought for retrieval and assessed for eligibility (n=64)

Articles excluded: n=49  
**Reason 1:** Ineligible population (n=5)  
**Reason 2:** Ineligible study design (n=14)  
**Reason 3:** No data on sex with FSWs (n=23)  
**Reason 4:** No full text available (n=4)  
**Reason 5:** Non-English language (n=1) – French  
**Reason 6:** Results different from title (n=1)  
**Reason 7:** Duplicate article (n=1)

Included

Articles included in review (n =15)



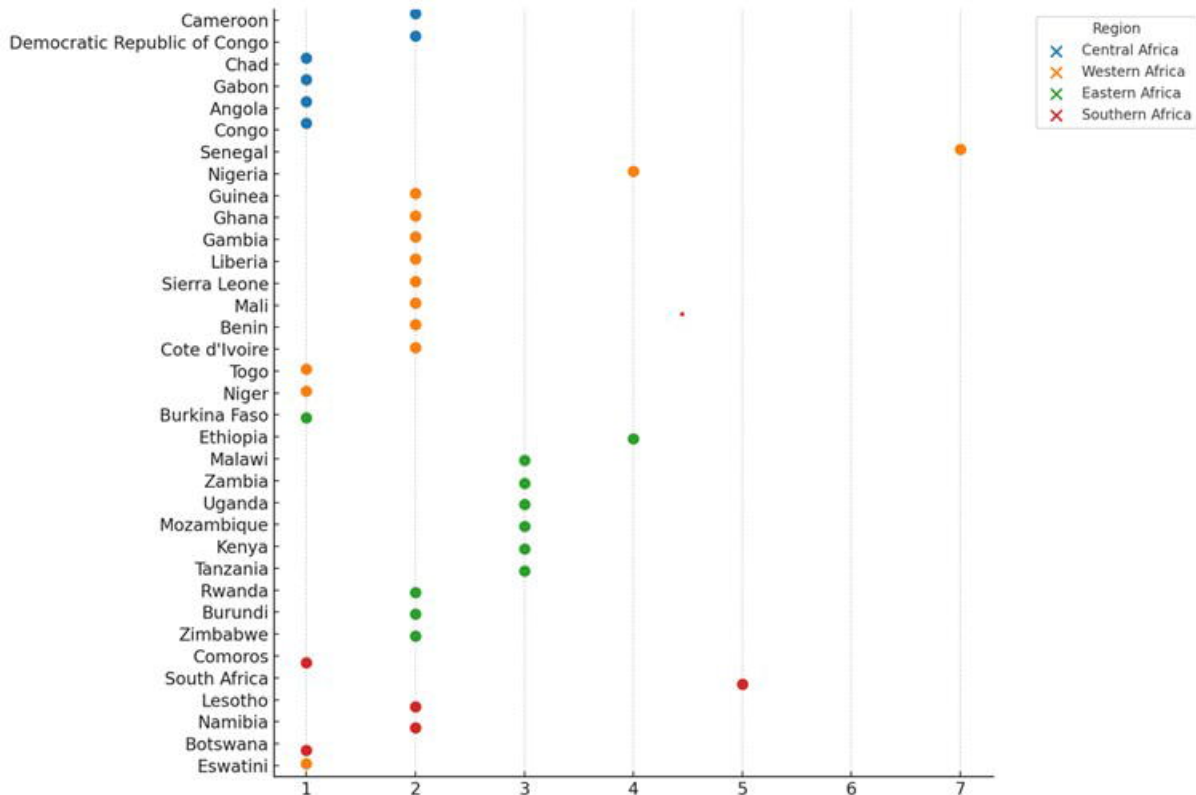

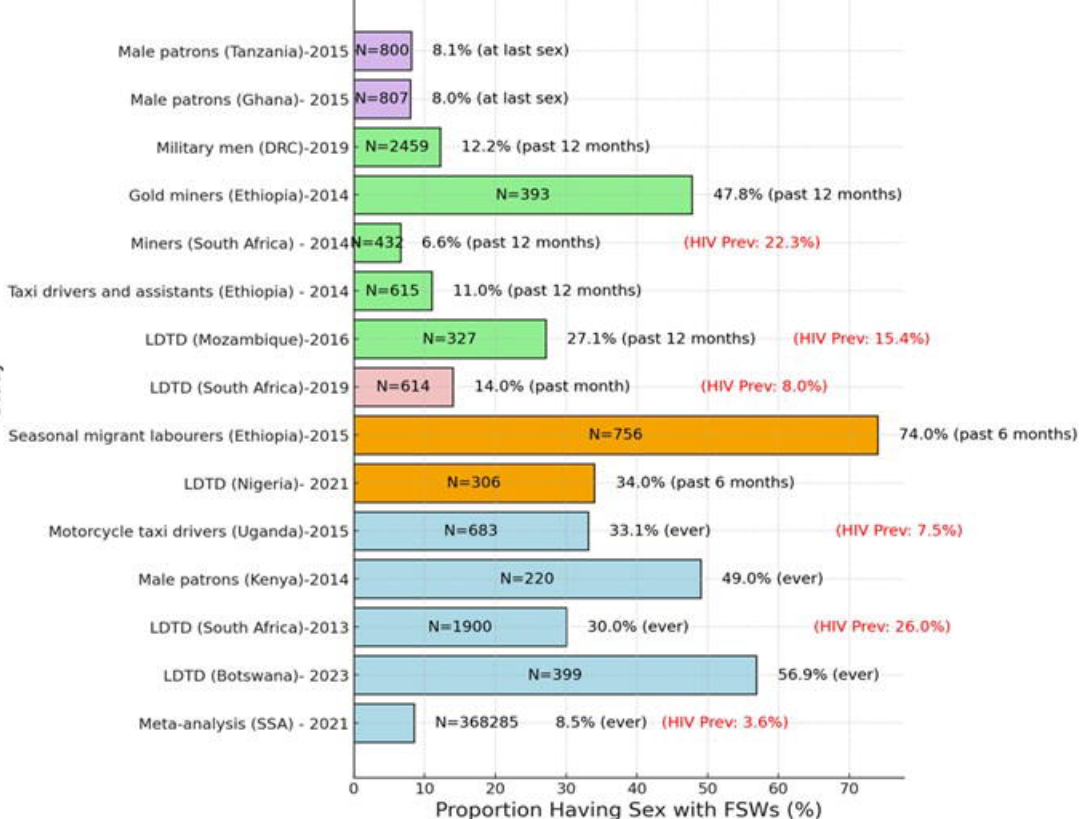

Study

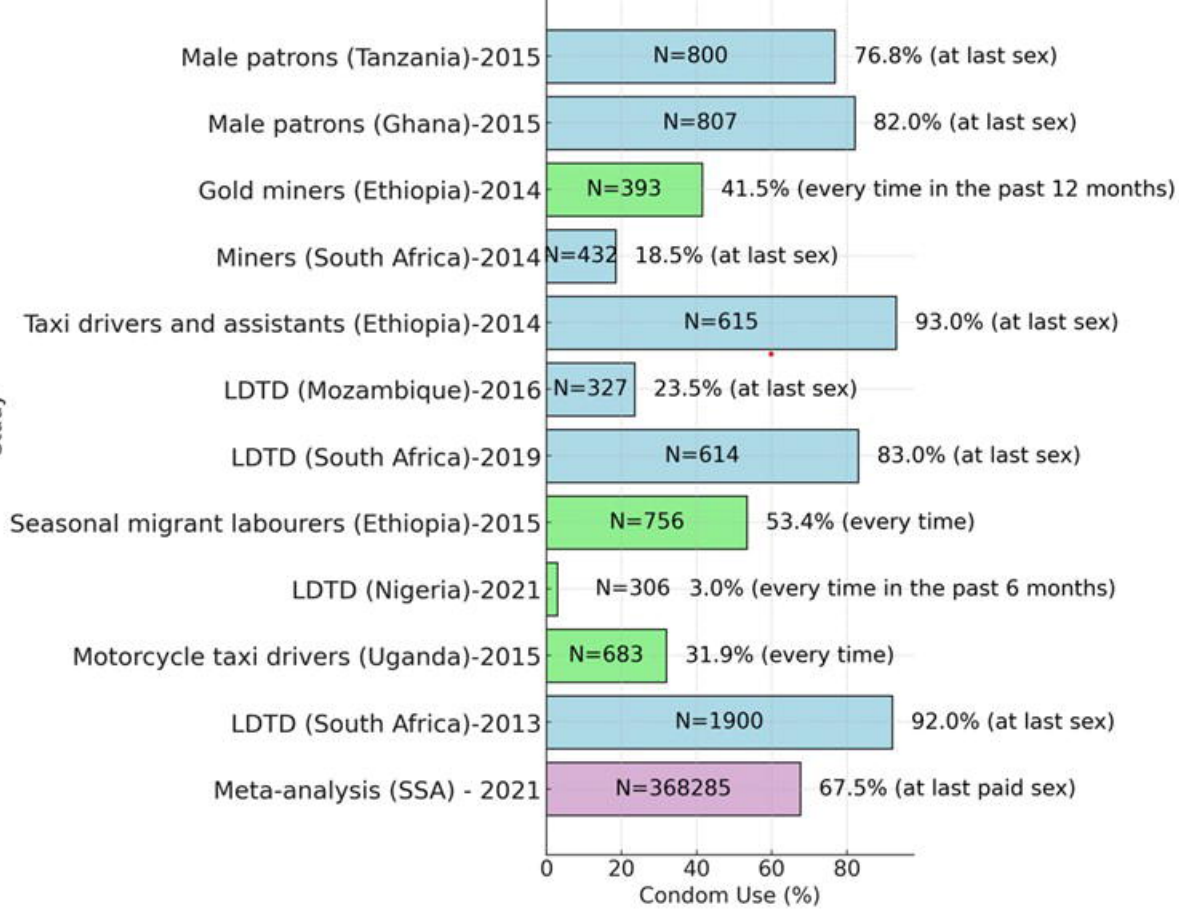

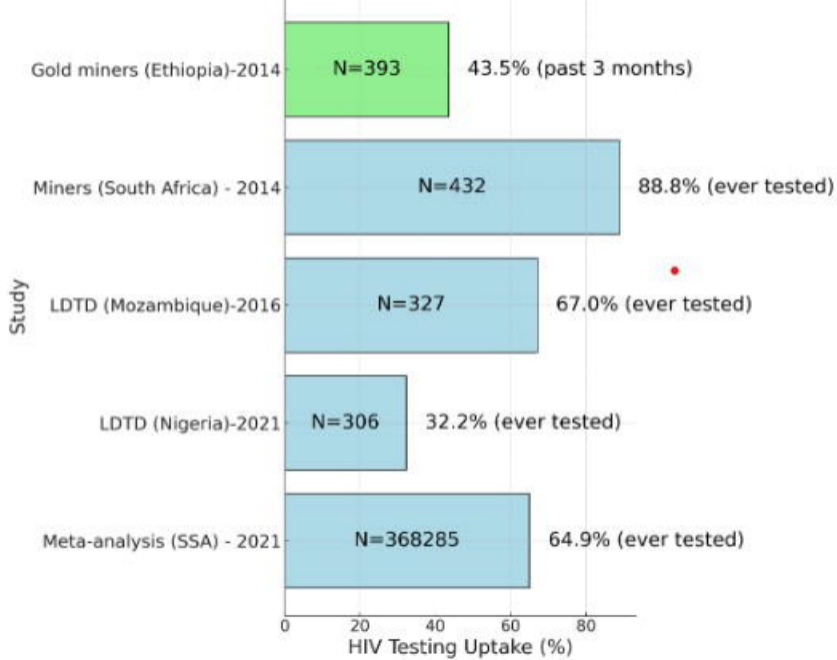

Source: https://medrxiv.org/content/medrxiv/early/2024/12/05/2024.12.03.24318456.full.pdf
